# Supplementary material for: A Provisional Gene Regulatory Atlas for Mouse Heart Development
Source: PLoS One. 2014 Jan 8;9(1):e83364. doi: 10.1371/journal.pone.0083364 (PMC3885437; doi:10.1371/journal.pone.0083364)
Supplement: Table S3 — Assignment of development phase to modules according to expression levels. This table also contains adjusted p-values (FDR<.05) for ANOVA and individual t-tests of differential expression. (XLSX) [file pone.0083364.s005.xlsx]

## Sheet: phase_exp_stat_fdr_heart.txt
Module No	Adjusted P Value of 7 Phases	Adjusted P Value of E10.5 and the others	Adjusted P Value of E11.5 and the others	Adjusted P Value of E12.5 and the others	Adjusted P Value of E13.5 and the others	Adjusted P Value of E14.5 and the others	Adjusted P Value of E16.5 and the others	Adjusted P Value of E18.5 and the others	Mean Expression at E10.5	Mean Expression at E11.5	Mean Expression at E12.5	Mean Expression at E13.5	Mean Expression at E14.5	Mean Expression at E16.5	Mean Expression at E18.5	Category
1	0.49061	N/A	N/A	N/A	N/A	N/A	N/A	N/A	4.99057	4.92547	4.95934	4.86027	4.99068	5.14517	4.96618	p_non
2	0.523075	N/A	N/A	N/A	N/A	N/A	N/A	N/A	4.54675	4.55702	4.54359	4.53914	4.49724	4.54283	4.53916	p_non
3	0.00420751	0.004128	0.0074503	0.152489	0.481802	0.557812	0.327158	0.318987	4.88095	4.90501	5.03536	5.06966	5.1173	5.34999	5.65814	p_non
4	0.00016515	0.000369926	0.0224996	0.15764	0.0106395	0.621313	0.239998	0.00455682	4.82188	4.81592	4.87446	4.84017	4.96047	5.06506	5.03097	p_non
5	7.57665e-05	0.00666239	0.0755914	0.60577	0.0290215	0.368927	0.382215	0.000323103	5.15005	5.08258	5.04941	4.99213	5.05487	5.00471	4.97138	p10.5
6	6.65901e-06	0.0141407	0.0143024	0.19394	0.254242	0.119338	0.013982	0.00012608	6.96892	7.18287	7.03112	5.81232	5.74913	5.59438	5.37878	p11.5
7	0.133654	N/A	N/A	N/A	N/A	N/A	N/A	N/A	5.8086	5.8001	5.9132	5.82813	5.93206	5.9132	5.90244	p_non
8	0.052201	N/A	N/A	N/A	N/A	N/A	N/A	N/A	5.56767	5.55724	5.59398	5.57263	5.61058	5.61031	5.61726	p_non
9	0.228473	N/A	N/A	N/A	N/A	N/A	N/A	N/A	5.07979	4.96986	5.05433	4.97308	5.02623	5.00494	4.97684	p_non
10	3.29065e-05	0.0326671	0.0206294	0.0502935	0.0994903	0.0229787	0.179886	0.0371832	5.4626	5.4743	5.48758	5.51032	5.48948	5.72968	5.86215	p18.5
11	0.145805	N/A	N/A	N/A	N/A	N/A	N/A	N/A	4.7425	4.7468	4.77048	4.7406	4.7657	4.74325	4.69977	p_non
12	8.44228e-06	0.0295141	0.373601	0.114848	0.76566	0.0309749	0.0664735	0.00666263	5.98375	5.98615	5.97294	5.94917	5.97152	5.90156	5.89216	p_non
13	0.00387187	0.0750941	0.755771	0.405826	0.523569	0.45119	0.10773	0.00275762	4.54113	4.50927	4.51911	4.51499	4.53057	4.48646	4.45789	p_non
14	0.00808137	0.0971897	0.0656432	0.865814	0.741432	0.0308724	0.944438	0.461923	4.35703	4.37041	4.31971	4.31002	4.28685	4.31516	4.30236	p_non
15	0.000127046	0.0195812	0.0356652	0.246444	0.0655345	0.0672344	0.0080562	0.00328494	6.16006	6.23387	6.22728	5.27495	5.28945	5.19629	5.15937	p11.5
16	0.210625	N/A	N/A	N/A	N/A	N/A	N/A	N/A	5.01786	4.9769	5.00531	4.99828	4.99935	4.96999	4.96475	p_non
17	0.941058	N/A	N/A	N/A	N/A	N/A	N/A	N/A	4.59946	4.55922	4.59218	4.56968	4.59352	4.59474	4.57878	p_non
18	0.588944	N/A	N/A	N/A	N/A	N/A	N/A	N/A	4.67396	4.66143	4.71433	4.65023	4.71822	4.65996	4.65918	p_non
19	0.145534	N/A	N/A	N/A	N/A	N/A	N/A	N/A	4.79819	4.77813	4.83824	4.80949	4.81921	4.82902	4.82858	p_non
20	0.322721	N/A	N/A	N/A	N/A	N/A	N/A	N/A	4.9635	4.86125	4.94968	4.86733	4.91596	4.90068	4.87507	p_non
21	0.691265	N/A	N/A	N/A	N/A	N/A	N/A	N/A	4.91155	4.87529	4.89228	4.8911	4.91934	4.89834	4.85765	p_non
22	0.289448	N/A	N/A	N/A	N/A	N/A	N/A	N/A	5.1524	5.1028	5.16622	5.11112	5.15735	5.12218	5.09762	p_non
23	0.119681	N/A	N/A	N/A	N/A	N/A	N/A	N/A	5.57437	5.55309	5.59473	5.56808	5.63284	5.62611	5.60955	p_non
24	0.00279999	0.00392142	0.0159177	0.158997	0.23107	0.806783	0.341586	0.310831	4.91659	4.93228	4.99882	4.98947	5.06182	5.19253	5.311	p_non
25	0.215398	N/A	N/A	N/A	N/A	N/A	N/A	N/A	4.91297	4.92046	4.89732	4.88097	4.94896	4.93921	4.944	p_non
26	0.26648	N/A	N/A	N/A	N/A	N/A	N/A	N/A	5.34898	5.24809	5.24725	5.26847	5.24857	5.27522	5.22675	p_non
27	0.438774	N/A	N/A	N/A	N/A	N/A	N/A	N/A	4.56891	4.55834	4.56727	4.53788	4.5784	4.53747	4.54243	p_non
28	0.099163	N/A	N/A	N/A	N/A	N/A	N/A	N/A	5.63538	5.6335	5.61437	5.57165	5.64571	5.55958	5.55172	p_non
29	0.882666	N/A	N/A	N/A	N/A	N/A	N/A	N/A	5.29899	5.28099	5.34117	5.29819	5.36151	5.33107	5.2914	p_non
30	0.24267	N/A	N/A	N/A	N/A	N/A	N/A	N/A	4.8884	4.86295	4.89967	4.86228	4.8975	4.86148	4.847	p_non
31	0.922436	N/A	N/A	N/A	N/A	N/A	N/A	N/A	4.97725	4.98492	4.97075	4.93052	4.99288	4.96209	4.97026	p_non
32	7.40553e-07	0.000146073	0.0627621	0.563372	0.0351022	0.902786	0.142496	0.00168964	5.00653	4.98149	5.06349	5.02959	5.07153	5.1122	5.18664	p18.5
33	0.513066	N/A	N/A	N/A	N/A	N/A	N/A	N/A	3.99355	3.95716	3.97943	3.97184	3.99461	3.98528	3.98975	p_non
34	2.49291e-10	4.09348e-09	0.0180402	0.117054	0.231038	0.412764	0.0263395	2.72308e-05	6.20438	6.2482	6.30662	6.30506	6.36491	6.38072	6.4228	p18.5
35	0.562787	N/A	N/A	N/A	N/A	N/A	N/A	N/A	4.86858	4.81639	4.8662	4.83683	4.86237	4.87216	4.869	p_non
36	0.0029082	0.0229765	0.80127	0.228895	0.918205	0.110866	0.801205	0.228895	6.39811	6.30383	6.32002	6.2874	6.25176	6.28251	6.25573	p10.5
37	0.357596	N/A	N/A	N/A	N/A	N/A	N/A	N/A	4.1395	4.11716	4.13699	4.10948	4.11602	4.12143	4.11496	p_non
38	0.642735	N/A	N/A	N/A	N/A	N/A	N/A	N/A	8.81849	8.8601	8.79674	8.82202	8.81735	8.77918	8.82798	p_non
39	0.0682607	N/A	N/A	N/A	N/A	N/A	N/A	N/A	5.66533	5.63374	5.6675	5.57943	5.67154	5.58219	5.56963	p_non
40	0.97548	N/A	N/A	N/A	N/A	N/A	N/A	N/A	6.28507	6.46065	6.37317	6.34091	6.38815	6.35662	6.35977	p_non
41	0.0135738	0.000288527	0.958341	0.629584	0.867916	0.563762	0.632614	0.0187577	8.09981	8.15153	8.13675	8.14632	8.13945	8.13654	8.21459	p18.5
42	0.980085	N/A	N/A	N/A	N/A	N/A	N/A	N/A	4.7238	4.70717	4.74174	4.71128	4.75084	4.73422	4.71255	p_non
43	0.466902	N/A	N/A	N/A	N/A	N/A	N/A	N/A	8.16733	8.27021	8.20908	8.29547	8.18632	8.21227	8.13966	p_non
44	0.49061	N/A	N/A	N/A	N/A	N/A	N/A	N/A	6.34967	6.40209	6.42417	6.43629	6.44022	6.40845	6.41898	p_non
45	0.132706	N/A	N/A	N/A	N/A	N/A	N/A	N/A	4.95188	4.90135	4.93378	4.8519	4.9496	4.87806	4.86781	p_non
46	0.0362647	0.000497801	0.0136712	0.525952	0.94827	0.800038	0.562527	0.451688	5.67248	5.85462	6.07208	6.29486	6.1817	6.5861	6.71025	p_non
47	0.0346444	0.0665293	0.144286	0.833535	0.711486	0.625403	0.240078	0.421052	5.00363	4.99856	5.05185	5.03334	5.03142	5.07937	5.07925	p_non
48	0.128154	N/A	N/A	N/A	N/A	N/A	N/A	N/A	8.18142	8.11995	8.12942	8.17215	8.1077	8.18862	8.26323	p_non
49	0.766188	N/A	N/A	N/A	N/A	N/A	N/A	N/A	5.35149	5.34404	5.42001	5.36663	5.39957	5.38635	5.37252	p_non
50	0.0206246	0.0699757	0.0018471	0.385743	0.738009	0.83094	0.704027	0.26813	5.31942	5.31782	5.29622	5.21261	5.22904	5.21528	5.16274	p_non
51	0.357036	N/A	N/A	N/A	N/A	N/A	N/A	N/A	8.98095	9.01056	8.92044	8.92811	8.88443	8.88671	8.98188	p_non
52	0.667919	N/A	N/A	N/A	N/A	N/A	N/A	N/A	5.61553	5.60773	5.6924	5.60054	5.69693	5.64647	5.65125	p_non
53	0.684313	N/A	N/A	N/A	N/A	N/A	N/A	N/A	5.7031	5.72916	5.81863	5.69449	5.79204	5.75374	5.7618	p_non
54	0.0127488	0.225327	0.938492	0.29002	0.870791	0.355421	0.375066	0.403429	8.05823	7.96599	7.98687	7.95222	7.93372	7.92935	7.93668	p_non
55	0.100411	N/A	N/A	N/A	N/A	N/A	N/A	N/A	5.45653	5.37361	5.36553	5.37061	5.38261	5.35747	5.32783	p_non
56	0.0344554	0.375066	0.174502	0.789216	0.221163	0.444558	0.568321	0.0749752	4.9168	4.88562	4.97264	4.91954	5.0066	4.97887	4.99732	p_non
57	0.460986	N/A	N/A	N/A	N/A	N/A	N/A	N/A	5.45791	5.46121	5.45591	5.43658	5.46862	5.4725	5.47497	p_non
58	0.083644	N/A	N/A	N/A	N/A	N/A	N/A	N/A	5.0364	5.03358	5.00569	4.95552	5.04721	4.97476	4.94964	p_non
59	7.57665e-05	4.75526e-13	0.020684	0.989543	0.190099	0.602254	0.114674	0.480469	7.57249	7.71268	7.99329	8.07913	8.02679	8.15902	8.06599	p_non
60	0.330891	N/A	N/A	N/A	N/A	N/A	N/A	N/A	5.84845	5.79679	5.82587	5.75559	5.81528	5.79951	5.77943	p_non
61	0.401066	N/A	N/A	N/A	N/A	N/A	N/A	N/A	6.46382	6.43387	6.41693	6.38495	6.37126	6.3782	6.43095	p_non
62	0.49061	N/A	N/A	N/A	N/A	N/A	N/A	N/A	5.37544	5.35147	5.40833	5.37578	5.39402	5.39444	5.39645	p_non
63	0.492969	N/A	N/A	N/A	N/A	N/A	N/A	N/A	4.90562	4.90097	4.87302	4.85944	4.91106	4.93802	4.91339	p_non
64	0.500615	N/A	N/A	N/A	N/A	N/A	N/A	N/A	6.25816	6.30276	6.3566	6.20269	6.29678	6.27779	6.25342	p_non
65	0.539722	N/A	N/A	N/A	N/A	N/A	N/A	N/A	8.21344	8.21666	8.20099	8.24428	8.19755	8.25586	8.24297	p_non
66	0.0982343	N/A	N/A	N/A	N/A	N/A	N/A	N/A	7.96304	7.97958	7.90222	7.98518	7.90289	7.88037	7.87323	p_non
67	0.759547	N/A	N/A	N/A	N/A	N/A	N/A	N/A	4.92956	4.93348	4.96753	4.94198	5.00874	4.93297	4.91867	p_non
68	0.905901	N/A	N/A	N/A	N/A	N/A	N/A	N/A	5.16513	5.14354	5.24964	5.11883	5.15096	5.20074	5.16139	p_non
69	3.37335e-09	0.000106057	0.0643225	0.0337469	0.779792	0.326268	0.136393	0.00792212	7.75766	7.65899	7.68994	7.61055	7.57522	7.54839	7.47259	p10.5
70	0.00209183	0.00713599	0.00386147	0.526702	0.212713	0.796973	0.324406	0.177317	9.40907	9.43497	9.36082	9.39005	9.31713	9.26385	9.24763	p11.5
71	0.199243	N/A	N/A	N/A	N/A	N/A	N/A	N/A	5.18562	5.10141	5.07785	5.10888	5.10423	5.10488	5.06098	p_non
72	0.0120005	0.219081	0.0749753	0.0541767	0.274841	0.88284	0.495344	0.206121	4.68336	4.67981	4.66313	4.66721	4.73256	4.77532	4.82106	p_non
73	0.0353031	0.461923	0.280941	0.25718	0.719991	0.179886	0.327158	0.0367585	7.36041	7.29575	7.29018	7.3267	7.26855	7.38799	7.45481	p18.5
74	0.192305	N/A	N/A	N/A	N/A	N/A	N/A	N/A	5.11307	5.10865	5.11068	5.07307	5.10726	5.08531	5.04847	p_non
75	0.638016	N/A	N/A	N/A	N/A	N/A	N/A	N/A	5.41681	5.42851	5.47788	5.41023	5.46045	5.4504	5.45028	p_non
76	0.0131095	0.0414787	0.462299	0.245285	0.58234	0.717574	0.703365	0.147034	9.90533	9.94701	9.91521	10.015	9.99733	9.99888	10.0449	p_non
77	0.00084509	0.185766	0.167675	0.215914	0.347288	0.657622	0.307689	0.000898922	4.93825	4.90599	4.95697	4.86374	4.8725	4.86349	4.81906	p_non
78	0.522006	N/A	N/A	N/A	N/A	N/A	N/A	N/A	8.14628	8.17587	8.11392	8.18172	8.10561	8.12515	8.11378	p_non
79	0.102455	N/A	N/A	N/A	N/A	N/A	N/A	N/A	7.01647	7.06612	7.10979	7.10908	7.06264	7.14925	7.14714	p_non
80	0.415166	N/A	N/A	N/A	N/A	N/A	N/A	N/A	4.47685	4.41853	4.49167	4.43034	4.47052	4.45388	4.42846	p_non
81	0.13144	N/A	N/A	N/A	N/A	N/A	N/A	N/A	5.14314	5.09775	5.12728	5.1245	5.11898	5.11114	5.08022	p_non
82	0.0017165	2.02364e-07	0.0214944	0.594351	0.371294	0.570418	0.432154	0.174412	8.56702	8.74141	8.78863	8.90808	8.85876	8.85508	8.8994	p_non
83	0.000646647	9.71571e-08	7.51965e-05	0.406743	0.83103	0.91208	0.325056	0.309121	6.49606	6.65089	6.88226	7.04184	6.98831	7.25707	7.27968	p_non
84	0.0791959	N/A	N/A	N/A	N/A	N/A	N/A	N/A	6.55655	6.87194	6.79197	7.06826	7.38906	7.27894	7.30048	p_non
85	1.31547e-09	3.23668e-11	0.0170522	0.107853	0.371194	0.794963	0.174314	0.00243022	6.44228	6.33603	6.31667	6.29003	6.25856	6.21589	6.1432	p10.5
86	2.50168e-05	0.166054	0.252735	0.504481	0.110484	0.7656	0.0607269	0.000354099	5.00236	4.94008	5.0241	4.99012	5.02493	5.06802	5.13434	p18.5
87	0.810139	N/A	N/A	N/A	N/A	N/A	N/A	N/A	5.3607	5.36043	5.40063	5.37417	5.4111	5.37562	5.3738	p_non
88	0.97548	N/A	N/A	N/A	N/A	N/A	N/A	N/A	7.85602	7.84045	7.80236	7.86158	7.80706	7.82959	7.85033	p_non
89	0.00554229	0.354106	0.482642	0.295576	0.709481	0.704027	0.0701601	0.422663	5.72499	5.7216	5.72506	5.69219	5.70188	5.65933	5.6818	p_non
90	0.80813	N/A	N/A	N/A	N/A	N/A	N/A	N/A	5.21192	5.19415	5.24504	5.20805	5.23402	5.21352	5.20584	p_non
91	0.00301166	1.97152e-05	0.000971267	0.0598893	0.898173	0.734275	0.368927	0.403429	4.49058	4.62365	4.7329	5.0432	5.1132	5.32352	5.3062	p_non
92	0.139499	N/A	N/A	N/A	N/A	N/A	N/A	N/A	7.44523	7.41403	7.41069	7.38737	7.3271	7.3673	7.40489	p_non
93	0.00130164	0.00432855	0.179406	0.369658	0.415285	0.341586	0.679917	0.010619	6.94897	6.96065	6.96491	6.96094	6.96086	6.99631	7.06767	p18.5
94	9.0553e-06	0.00268035	0.0113518	0.829166	0.829166	0.902644	0.634753	0.00370539	6.1952	6.16587	6.01449	5.9914	5.99598	5.97883	5.8596	p10.5
95	1.22549e-05	0.0314922	0.00388068	0.160692	0.805798	0.229984	0.260956	0.0181637	6.91041	6.97923	6.98702	7.0608	7.01253	7.10138	7.17632	p18.5
96	5.16594e-11	1.21489e-09	0.00271443	0.133341	0.346288	0.580677	0.0276142	4.47263e-06	4.5963	4.60781	4.68954	4.69339	4.74214	4.76524	4.84417	p18.5
97	4.65289e-05	0.0108508	0.00965586	0.461923	0.778669	0.784484	0.369194	1.62107e-07	5.97216	5.82141	5.65909	5.65101	5.62495	5.46452	5.24314	p10.5
98	0.415166	N/A	N/A	N/A	N/A	N/A	N/A	N/A	5.57712	5.57782	5.59016	5.66848	5.57314	5.65568	5.65273	p_non
99	0.0150452	0.0160208	0.54223	0.354106	0.779302	0.597625	0.723129	0.210023	6.10271	6.11459	6.12027	6.19665	6.1972	6.19944	6.25041	p_non
100	0.000483615	0.0639825	0.0254626	0.269307	0.325833	0.882985	0.0070192	0.304119	4.56163	4.53754	4.57681	4.58087	4.60003	4.66069	4.65952	p16.5
101	1.33035e-09	0.0112592	0.017476	0.281881	0.56973	0.793499	0.00150467	0.000695183	6.21555	6.11461	6.02319	5.97564	5.98964	5.90755	5.92187	p10.5
102	0.194192	N/A	N/A	N/A	N/A	N/A	N/A	N/A	7.38293	7.42689	7.45246	7.44098	7.3633	7.34864	7.36117	p_non
103	0.369466	N/A	N/A	N/A	N/A	N/A	N/A	N/A	5.33257	5.33024	5.45161	5.3556	5.43692	5.39686	5.41308	p_non
104	0.0580451	N/A	N/A	N/A	N/A	N/A	N/A	N/A	5.31348	5.30331	5.33662	5.2693	5.31208	5.28087	5.23713	p_non
105	0.000446274	0.119338	0.317412	0.546972	0.971085	0.989791	0.287196	0.00592225	7.31841	7.39895	7.40335	7.4272	7.42791	7.46955	7.48384	p18.5
106	0.802839	N/A	N/A	N/A	N/A	N/A	N/A	N/A	5.38144	5.3462	5.42194	5.35072	5.43004	5.36397	5.3628	p_non
107	0.14092	N/A	N/A	N/A	N/A	N/A	N/A	N/A	7.79144	7.69654	7.77358	7.7055	7.73253	7.76797	7.83281	p_non
108	0.554896	N/A	N/A	N/A	N/A	N/A	N/A	N/A	4.23381	4.20355	4.24804	4.208	4.24731	4.21078	4.21192	p_non
109	0.0280992	0.210975	0.466031	0.415653	0.042801	0.313083	0.345457	0.108049	4.95286	4.88246	4.88409	4.80417	4.90738	4.8167	4.8196	p_non
110	0.000341544	0.01192	0.00104971	0.681934	0.470599	0.592402	0.592328	0.0819157	6.63857	6.66216	6.76837	6.7367	6.7873	6.77885	6.82697	p_non
111	0.107556	N/A	N/A	N/A	N/A	N/A	N/A	N/A	7.30015	7.4121	7.40791	7.48984	7.44145	7.47909	7.45571	p_non
112	0.0081486	0.109455	0.0170522	0.531391	0.497362	0.19807	0.219373	0.00010312	5.12713	5.12451	5.09957	5.0695	5.14644	5.05777	5.01459	p_non
113	3.02957e-12	5.19967e-13	0.000628179	0.0123564	0.730219	0.437288	0.000820986	1.12192e-06	6.17169	6.65678	6.75235	7.17648	7.2689	7.49922	7.62856	p18.5
114	0.00119582	0.00154824	0.109388	0.934847	0.390904	0.310272	0.449024	0.228741	7.55481	7.51417	7.45136	7.47824	7.40503	7.41771	7.40641	p10.5
115	0.00251548	0.0621422	0.0252622	0.790603	0.361921	0.809165	0.0902825	0.232878	4.27483	4.28185	4.30744	4.29807	4.31904	4.34195	4.33229	p_non
116	0.00303829	0.00334726	0.30317	0.760377	0.408229	0.451688	0.109113	0.36169	6.61348	6.57657	6.52379	6.55718	6.5019	6.49327	6.50791	p10.5
117	0.912079	N/A	N/A	N/A	N/A	N/A	N/A	N/A	5.25065	5.24914	5.29259	5.2643	5.28338	5.26179	5.25508	p_non
118	0.80813	N/A	N/A	N/A	N/A	N/A	N/A	N/A	8.00799	8.0218	7.98626	8.07701	7.99396	8.01384	7.98929	p_non
119	2.98792e-09	2.35043e-06	0.000675922	0.357948	0.822897	0.939308	0.0638023	0.0017327	6.82723	6.74768	6.55086	6.48982	6.4968	6.38294	6.31005	p10.5
120	0.0412261	0.00548491	0.540475	0.312558	0.386692	0.971085	0.2854	0.340478	8.14995	8.25386	8.1883	8.27038	8.24112	8.26929	8.26491	p_non
121	0.311981	N/A	N/A	N/A	N/A	N/A	N/A	N/A	7.28423	7.2839	7.24728	7.26102	7.20682	7.26769	7.34877	p_non
122	0.228473	N/A	N/A	N/A	N/A	N/A	N/A	N/A	8.8445	8.88029	8.81499	8.88513	8.86701	8.88709	8.88343	p_non
123	0.000341544	0.00269035	0.00859041	0.687495	0.292215	0.770281	0.151118	0.202037	9.61885	9.60587	9.48237	9.52182	9.43592	9.35319	9.36192	p10.5
124	0.833891	N/A	N/A	N/A	N/A	N/A	N/A	N/A	6.9269	6.92557	6.93951	6.97147	6.89488	6.97248	6.93922	p_non
125	0.0747266	N/A	N/A	N/A	N/A	N/A	N/A	N/A	5.04516	4.9655	5.01503	4.95593	4.96784	4.97667	4.95176	p_non
126	1.33234e-06	0.0115023	0.0307341	0.887396	0.815832	0.474759	0.0267163	0.0118178	9.37542	9.35661	9.24427	9.24792	9.21961	9.18368	9.1661	p10.5
127	0.319816	N/A	N/A	N/A	N/A	N/A	N/A	N/A	4.06614	4.03021	4.07165	4.03381	4.05043	4.036	4.03957	p_non
128	7.39948e-05	0.000109103	9.25442e-06	0.410714	0.98336	0.59115	0.34306	0.174412	5.19581	5.16978	5.12649	5.1069	5.09138	5.07966	5.05797	p10.5
129	0.376341	N/A	N/A	N/A	N/A	N/A	N/A	N/A	8.16541	8.15777	8.16259	8.16429	8.12714	8.17706	8.217	p_non
130	0.0421754	0.447221	0.515934	0.325292	0.805798	0.244238	0.98176	0.00371149	4.93373	4.93675	4.94163	4.91125	4.9605	4.91694	4.8417	p_non
131	0.917291	N/A	N/A	N/A	N/A	N/A	N/A	N/A	5.08506	5.08018	5.09713	5.07104	5.11421	5.09031	5.08297	p_non
132	0.000472508	0.485421	6.39411e-06	0.49057	0.676088	0.325833	0.167966	0.000864377	8.18373	8.21897	8.18721	8.1746	8.18371	8.13893	8.0993	p11.5
133	0.000169885	0.0542906	0.224161	0.171109	0.323976	0.83552	0.313973	0.0474725	8.5105	8.48616	8.49614	8.43509	8.45656	8.42289	8.40379	p_non
134	0.612834	N/A	N/A	N/A	N/A	N/A	N/A	N/A	4.70623	4.67884	4.72075	4.67259	4.72558	4.67705	4.6834	p_non
135	0.58578	N/A	N/A	N/A	N/A	N/A	N/A	N/A	6.9229	6.96586	6.92393	6.96422	6.91171	6.94637	6.96842	p_non
136	0.488117	N/A	N/A	N/A	N/A	N/A	N/A	N/A	5.89351	5.96182	6.03269	5.92494	5.98221	5.92988	5.9086	p_non
137	0.18104	N/A	N/A	N/A	N/A	N/A	N/A	N/A	5.14714	5.16771	5.21318	5.19007	5.22935	5.20171	5.21915	p_non
138	0.912079	N/A	N/A	N/A	N/A	N/A	N/A	N/A	5.77769	5.76453	5.76419	5.71785	5.80211	5.75927	5.75245	p_non
139	1.70551e-05	0.0161029	0.00449357	0.255618	0.876659	0.570911	0.223517	0.000172062	8.46749	8.48364	8.51199	8.58862	8.54329	8.62985	8.74679	p18.5
140	0.00174308	0.000336393	0.0187785	0.246721	0.32556	0.92817	0.108049	0.0804289	7.15023	7.21962	7.20969	7.36378	7.28892	7.34638	7.37666	p_non
141	1.56408e-08	4.51873e-11	0.0894157	0.246444	0.583249	0.628112	0.00448125	0.00699618	8.53706	8.42163	8.33467	8.33225	8.26987	8.21079	8.16086	p10.5
142	0.0194577	0.00540226	0.315713	0.694336	0.0608311	0.608784	0.580215	0.187964	7.61417	7.7002	7.73014	7.80199	7.70842	7.78078	7.82344	p_non
143	0.794438	N/A	N/A	N/A	N/A	N/A	N/A	N/A	5.30551	5.29131	5.36095	5.30894	5.34042	5.32595	5.32096	p_non
144	0.568731	N/A	N/A	N/A	N/A	N/A	N/A	N/A	5.34063	5.34697	5.42308	5.34503	5.47784	5.38736	5.3835	p_non
145	0.869681	N/A	N/A	N/A	N/A	N/A	N/A	N/A	6.2972	6.29026	6.38327	6.30515	6.41307	6.33365	6.31102	p_non
146	0.97548	N/A	N/A	N/A	N/A	N/A	N/A	N/A	6.27624	6.3067	6.27523	6.21867	6.31306	6.27858	6.27361	p_non
147	0.000223102	0.0896208	0.133341	0.184214	0.452264	0.473851	0.224161	0.140997	5.25441	5.29059	5.30651	5.32351	5.32121	5.41196	5.45195	p_non
148	0.296148	N/A	N/A	N/A	N/A	N/A	N/A	N/A	8.3819	8.42921	8.40054	8.4084	8.39884	8.37862	8.38922	p_non
149	0.00514969	0.0233349	0.0924259	0.815832	0.119341	0.83094	0.246721	0.0959694	8.13657	8.13681	8.07205	8.1216	8.04379	8.00518	7.98556	p_non
150	3.53277e-06	5.46253e-08	0.023795	0.0677519	0.709524	0.979548	0.00931461	0.00503029	6.75537	6.70023	6.68167	6.64561	6.6266	6.54511	6.5224	p10.5
151	1.01378e-06	0.00452426	0.000504144	0.0585314	0.139968	0.150986	0.367438	0.00288831	7.50291	7.51462	7.54614	7.55799	7.55659	7.65591	7.81229	p18.5
152	0.986458	N/A	N/A	N/A	N/A	N/A	N/A	N/A	4.90889	4.87116	4.89982	4.8702	4.84824	4.94175	4.87492	p_non
153	0.225843	N/A	N/A	N/A	N/A	N/A	N/A	N/A	6.60843	6.79222	6.68712	6.74529	6.73781	6.73505	6.73046	p_non
154	1.24243e-08	8.13704e-06	0.0295141	0.453836	0.865487	0.122128	0.0159182	0.000501827	7.97316	8.02479	8.08355	8.09674	8.06446	8.16852	8.19311	p18.5
155	0.105479	N/A	N/A	N/A	N/A	N/A	N/A	N/A	5.48934	5.49074	5.46988	5.45406	5.50152	5.43689	5.4444	p_non
156	0.133486	N/A	N/A	N/A	N/A	N/A	N/A	N/A	7.71979	7.74858	7.67048	7.74614	7.67674	7.656	7.65291	p_non
157	0.00841976	0.725152	1.51753e-05	0.238576	0.340077	0.520603	0.416973	0.029761	6.20637	6.34478	6.29681	6.13286	6.22938	6.14474	6.07407	p11.5
158	0.678048	N/A	N/A	N/A	N/A	N/A	N/A	N/A	4.65923	4.63887	4.7029	4.65391	4.69799	4.70015	4.66018	p_non
159	0.0323496	0.0381169	0.00382519	0.132257	0.368927	0.689186	0.499969	0.268756	4.00528	3.97958	4.02345	4.05173	4.11496	4.22462	4.14845	p_non
160	0.399218	N/A	N/A	N/A	N/A	N/A	N/A	N/A	4.66198	4.63387	4.66934	4.6393	4.66318	4.6333	4.6317	p_non
161	0.424308	N/A	N/A	N/A	N/A	N/A	N/A	N/A	7.46639	7.54876	7.54475	7.58434	7.51696	7.55151	7.57374	p_non
162	0.151831	N/A	N/A	N/A	N/A	N/A	N/A	N/A	7.28326	7.32292	7.20431	7.31887	7.33219	7.30979	7.34143	p_non
163	0.465108	N/A	N/A	N/A	N/A	N/A	N/A	N/A	5.82676	5.85525	5.7833	5.82884	5.79766	5.79613	5.80399	p_non
164	0.00417439	0.004128	0.063591	0.444558	0.460898	0.517846	0.357371	0.22569	8.76021	8.68468	8.57667	8.63984	8.56072	8.5707	8.55701	p10.5
165	8.43062e-10	1.04355e-05	7.64811e-08	0.0164694	0.834259	0.523715	0.00133918	0.00337475	5.11126	5.14256	5.19001	5.28202	5.29201	5.39507	5.35177	p16.5
166	0.04826	0.546901	0.23961	0.481537	0.17574	0.934687	0.565403	0.283647	7.85207	7.89532	7.86482	7.88694	7.83997	7.79028	7.7543	p_non
167	0.0231245	1.84243e-06	0.13373	0.428603	0.102071	0.534112	0.675298	0.112594	6.01549	6.05162	6.12878	6.05959	6.15375	6.12006	6.14965	p_non
168	0.0412261	0.0197595	0.744651	0.533055	0.200406	0.496786	0.193659	0.491009	4.8725	4.80331	4.81946	4.76141	4.82055	4.75452	4.7682	p10.5
169	0.00368874	1.86875e-05	0.00112411	0.205981	0.926089	0.968185	0.453836	0.353992	4.88531	5.04229	5.24863	5.52462	5.48655	5.8072	5.95188	p_non
170	0.221039	N/A	N/A	N/A	N/A	N/A	N/A	N/A	5.09424	5.07972	5.06998	5.04496	5.07412	5.02915	5.03301	p_non
171	0.109663	N/A	N/A	N/A	N/A	N/A	N/A	N/A	8.3072	8.32757	8.29668	8.35477	8.33474	8.35698	8.36895	p_non
172	3.47085e-09	1.4474e-08	2.99508e-09	0.31357	0.971085	0.44734	0.00496948	0.0114947	5.98723	5.98137	5.91889	5.90226	5.91222	5.846	5.84492	p10.5
173	0.293748	N/A	N/A	N/A	N/A	N/A	N/A	N/A	4.51527	4.49815	4.51922	4.48087	4.52149	4.4943	4.47311	p_non
174	0.0971726	N/A	N/A	N/A	N/A	N/A	N/A	N/A	5.88608	5.91427	6.01618	5.94509	6.06996	6.01617	6.01737	p_non
175	0.00841976	7.92468e-05	0.0607269	0.75294	0.0770293	0.71737	0.643697	0.145587	7.81807	7.8271	7.71141	7.77234	7.69038	7.69795	7.64334	p_non
176	0.0859571	N/A	N/A	N/A	N/A	N/A	N/A	N/A	8.07321	8.1474	8.04045	8.19155	8.17821	8.14677	8.18133	p_non
177	0.405534	N/A	N/A	N/A	N/A	N/A	N/A	N/A	7.60199	7.59324	7.76994	7.79545	7.66276	7.7425	7.71893	p_non
178	0.777324	N/A	N/A	N/A	N/A	N/A	N/A	N/A	4.79248	4.77422	4.82368	4.75648	4.82582	4.77348	4.78387	p_non
179	0.00337609	0.0835074	0.56973	0.0707022	0.588665	0.720888	0.81563	0.0399082	5.45651	5.44792	5.45752	5.44335	5.42497	5.42903	5.39404	p_non
180	2.30435e-10	0.00049285	0.00769642	0.0105666	0.806783	0.616926	0.0315208	8.02285e-06	7.31522	7.31726	7.22323	7.14123	7.15854	7.01498	6.92146	p11.5
181	4.83839e-10	1.2147e-06	0.0621422	0.109622	0.92272	0.243997	0.142496	0.00337475	5.85643	5.88103	5.95607	6.00227	6.04107	6.05198	6.11236	p18.5
182	0.555571	N/A	N/A	N/A	N/A	N/A	N/A	N/A	7.35779	7.26451	7.21815	7.24912	7.20902	7.2877	7.34457	p_non
183	0.998896	N/A	N/A	N/A	N/A	N/A	N/A	N/A	6.38191	6.34724	6.38716	6.3442	6.38387	6.33595	6.39014	p_non
184	0.27737	N/A	N/A	N/A	N/A	N/A	N/A	N/A	7.22788	7.26578	7.3219	7.26902	7.30726	7.2943	7.28576	p_non
185	0.00780255	0.0812288	0.0495358	0.01548	0.0925173	0.163919	0.880779	0.01192	7.35603	7.25645	7.24044	7.2448	7.26517	7.31713	7.487	p18.5
186	0.00681244	0.378943	0.0486588	0.625403	0.310514	0.146131	0.588381	0.00781661	5.50768	5.48336	5.50978	5.48214	5.47645	5.56203	5.67659	p18.5
187	0.00727303	0.0381197	0.704027	0.132257	0.163024	0.824745	0.56973	0.160692	5.10417	5.05807	5.12375	5.01754	5.04176	5.02995	4.99633	p_non
188	1.21225e-07	2.77671e-07	0.00012531	0.164313	0.217209	0.892499	0.0800421	0.0456805	5.02124	5.05943	5.19402	5.19237	5.26672	5.43154	5.42479	p_non
189	2.55156e-05	0.0151985	0.0344371	0.388791	0.212901	0.709154	0.293329	0.0146049	6.83609	6.86027	6.87433	6.86265	6.88702	6.92432	6.9772	p18.5
190	0.00445919	0.0598968	0.122796	0.260776	0.515934	0.836085	0.323258	0.238576	7.95599	7.98602	7.97286	8.04247	8.01357	8.04185	8.06973	p_non
191	6.32591e-05	4.55494e-05	0.0707078	0.657129	0.312558	0.709974	0.194791	0.0197102	5.66047	5.66384	5.75669	5.7375	5.79625	5.81513	5.85418	p18.5
192	0.044945	0.0407211	0.829167	0.149454	0.859252	0.390904	0.667375	0.0557323	6.37631	6.3161	6.37287	6.31284	6.30435	6.3366	6.26651	p10.5
193	0.614635	N/A	N/A	N/A	N/A	N/A	N/A	N/A	5.6369	5.65453	5.62078	5.61419	5.70385	5.64734	5.64578	p_non
194	0.372616	N/A	N/A	N/A	N/A	N/A	N/A	N/A	8.31793	8.26189	8.20745	8.26794	8.21514	8.27245	8.35038	p_non
195	0.0675422	N/A	N/A	N/A	N/A	N/A	N/A	N/A	6.84407	6.85928	6.75241	6.74191	6.68368	6.71031	6.75843	p_non
196	1.18268e-13	6.15112e-11	3.48999e-05	0.0544484	0.549191	0.840302	0.0100452	8.45016e-10	7.40437	7.20358	7.10115	7.01648	6.96024	6.81258	6.66229	p10.5
197	0.000922387	0.0382847	0.063591	0.180536	0.95737	0.568321	0.447221	0.00111549	8.73132	8.7269	8.70125	8.78833	8.74315	8.81617	8.9408	p18.5
198	0.000375731	0.0327868	0.0812167	0.580262	0.326049	0.581958	0.293641	0.0193306	7.85955	7.93899	7.98282	8.06131	7.99127	8.07763	8.12259	p18.5
199	2.10361e-11	4.92527e-07	2.63874e-05	0.0995657	0.944438	0.950166	0.00906106	6.31635e-07	8.31645	8.52508	8.58036	8.76285	8.75198	8.94262	9.0819	p18.5
200	1.59142e-05	0.0108508	0.0214853	0.234369	0.0933238	0.0414787	0.00859488	0.000934169	6.38475	6.55399	6.31682	4.90261	4.83965	4.74377	4.60608	p11.5
201	0.043758	0.0743363	0.040092	0.412764	0.0833279	0.604598	0.532621	0.0592522	8.44721	8.62017	8.56684	8.59863	8.54579	8.48139	8.38452	p11.5
202	0.00355636	0.0128602	0.273582	0.195587	0.0939775	0.592328	0.114022	0.00150467	5.38649	5.32825	5.39485	5.24602	5.32556	5.25132	5.23898	p_non
203	9.95472e-08	0.00875625	4.7617e-05	0.0765392	0.497749	0.515562	0.335498	0.00049285	5.73812	5.79785	5.87191	5.90648	6.00608	5.99099	6.15983	p18.5
204	2.29448e-06	9.22301e-08	0.00665104	0.529088	0.454764	0.827422	0.150405	0.0131166	6.56653	6.54148	6.36295	6.37695	6.35156	6.2062	6.12374	p10.5
205	1.94099e-08	1.61739e-07	0.0259156	0.314048	0.582356	0.558578	0.0168161	0.00137069	8.49397	8.39247	8.30244	8.29845	8.23364	8.18612	8.14908	p10.5
206	0.745476	N/A	N/A	N/A	N/A	N/A	N/A	N/A	6.1542	6.32511	6.17951	6.27249	6.31305	6.2143	6.14471	p_non
207	0.508521	N/A	N/A	N/A	N/A	N/A	N/A	N/A	7.62655	7.71338	7.6622	7.70327	7.72671	7.67029	7.6888	p_non
208	0.00072431	0.145587	0.000434513	0.412764	0.567198	0.391169	0.0697212	0.0114223	7.03889	7.01218	7.06961	7.12642	7.05367	7.18268	7.20679	p18.5
209	0.172691	N/A	N/A	N/A	N/A	N/A	N/A	N/A	4.61842	4.59724	4.65404	4.62453	4.64631	4.61137	4.56833	p_non
210	4.50569e-05	0.000675922	1.2147e-06	0.155817	0.75114	0.81184	0.423568	0.0174231	5.6059	5.60782	5.5515	5.46579	5.47628	5.44306	5.37867	p11.5
211	0.000551712	0.0107361	0.078529	0.167437	0.386519	0.281963	0.156332	0.000905231	5.28676	5.26014	5.26666	5.20427	5.26292	5.18581	5.16744	p10.5
212	2.34374e-08	1.91775e-08	0.00129741	0.176368	0.400362	0.614552	0.0161725	0.000930493	8.0598	8.0037	7.94959	7.90277	7.81487	7.72795	7.67384	p10.5
213	0.000241178	0.22385	2.68978e-09	0.499969	0.581847	0.515562	0.0164694	0.00577014	9.27703	9.40934	9.27636	9.28089	9.27506	9.16782	9.11321	p11.5
214	0.157495	N/A	N/A	N/A	N/A	N/A	N/A	N/A	4.45242	4.43444	4.4914	4.44276	4.47175	4.50192	4.49981	p_non
215	0.298844	N/A	N/A	N/A	N/A	N/A	N/A	N/A	4.65611	4.64318	4.70202	4.66066	4.71736	4.69848	4.70006	p_non
216	0.810139	N/A	N/A	N/A	N/A	N/A	N/A	N/A	4.5506	4.52515	4.58321	4.5485	4.54001	4.5754	4.52544	p_non
217	0.11923	N/A	N/A	N/A	N/A	N/A	N/A	N/A	8.86673	8.88832	8.81748	8.8499	8.80825	8.80003	8.82342	p_non
218	0.000471295	0.000732664	0.221308	0.820575	0.586828	0.880779	0.517212	0.0568423	5.66389	5.7301	5.80304	5.7705	5.80384	5.82292	5.88034	p_non
219	0.544892	N/A	N/A	N/A	N/A	N/A	N/A	N/A	6.04732	6.02512	6.08828	6.01425	6.07174	6.08668	6.0734	p_non
220	0.197255	N/A	N/A	N/A	N/A	N/A	N/A	N/A	7.89697	7.96752	7.82286	7.90425	7.87028	7.85622	7.81691	p_non
221	0.22411	N/A	N/A	N/A	N/A	N/A	N/A	N/A	5.68308	5.70941	5.74119	5.69757	5.77741	5.75005	5.73407	p_non
222	0.300612	N/A	N/A	N/A	N/A	N/A	N/A	N/A	5.28999	5.26546	5.2984	5.2662	5.36206	5.31476	5.32838	p_non
223	3.18145e-07	3.64653e-07	1.17325e-07	0.652464	0.268592	0.892499	0.0681739	0.00129741	7.26913	7.32151	7.09771	7.12547	7.0877	6.96698	6.87318	p11.5
224	0.172028	N/A	N/A	N/A	N/A	N/A	N/A	N/A	4.65518	4.62741	4.69047	4.65362	4.69871	4.70111	4.69173	p_non
225	7.55024e-13	1.11777e-09	2.1308e-06	0.00454576	0.299366	0.823355	0.0178142	0.000212238	6.67773	6.75482	6.83214	6.89519	6.9277	7.06516	7.21124	p18.5
226	0.254352	N/A	N/A	N/A	N/A	N/A	N/A	N/A	8.05397	8.24506	8.2253	8.27583	8.25581	8.13325	8.02063	p_non
227	0.000127303	0.37919	0.232499	0.246802	0.118483	0.542614	0.415653	0.000473128	8.23435	8.24446	8.23979	8.24266	8.18573	8.17511	8.12224	p_non
228	0.0675422	N/A	N/A	N/A	N/A	N/A	N/A	N/A	7.75647	7.68117	7.61324	7.61916	7.4974	7.57609	7.6063	p_non
229	0.0164164	0.00136426	0.0364122	0.687495	0.296385	0.657622	0.293927	0.428487	4.66398	4.66523	4.76014	4.71124	4.76402	4.77995	4.7736	p_non
230	0.145796	N/A	N/A	N/A	N/A	N/A	N/A	N/A	7.37018	7.3217	7.25758	7.32212	7.26908	7.28158	7.23783	p_non
231	1.08992e-05	0.0325609	0.0263479	0.503528	0.0936262	0.605006	0.640891	0.00170343	5.70825	5.71365	5.79695	5.76766	5.84381	5.8268	5.92693	p18.5
232	0.862092	N/A	N/A	N/A	N/A	N/A	N/A	N/A	6.00101	6.00323	6.00488	5.94245	6.01999	6.00488	5.97331	p_non
233	0.00124538	0.0371832	0.104151	0.695199	0.05616	0.504836	0.515612	0.0374391	7.20154	7.26962	7.32034	7.3996	7.31737	7.35915	7.38874	p_non
234	0.0284428	0.00875625	0.0990875	0.713027	0.534309	0.984204	0.182107	0.614552	5.91489	5.91292	6.08378	6.00651	6.05528	6.16045	6.10197	p_non
235	0.268239	N/A	N/A	N/A	N/A	N/A	N/A	N/A	4.0988	4.08374	4.10341	4.08247	4.10091	4.08112	4.07469	p_non
236	0.00268701	0.00153745	0.0404951	0.612139	0.357371	0.755427	0.507731	0.200556	8.6554	8.77873	8.82649	8.91937	8.87029	8.87644	8.91228	p_non
237	0.1174	N/A	N/A	N/A	N/A	N/A	N/A	N/A	5.18781	5.18825	5.29511	5.2298	5.31511	5.30292	5.2853	p_non
238	0.0113126	0.0372297	0.132257	0.180733	0.755771	0.497749	0.657622	0.00752923	6.23266	6.19941	6.20392	6.16	6.21461	6.16087	6.08752	p10.5
239	2.16353e-08	0.0613109	0.0105637	0.232045	0.507538	0.630173	0.30695	1.22906e-05	6.95057	7.01738	7.0335	7.09495	7.06965	7.10866	7.20376	p18.5
240	6.42354e-06	0.0233922	0.00647366	0.167341	0.448174	0.261411	0.0253389	2.6848e-05	7.21402	7.45	7.37622	6.3616	6.31544	6.1107	5.87119	p11.5
241	5.79402e-10	0.0467469	2.64043e-10	0.45119	0.95737	0.852305	4.45146e-05	0.00168964	6.35717	6.33074	6.1834	6.15323	6.14936	6.04771	6.05581	p10.5
242	8.72513e-08	5.38503e-06	0.0144463	0.183062	0.725152	0.905483	0.177271	0.00049285	5.55159	5.52323	5.5161	5.48364	5.48623	5.46707	5.43967	p10.5
243	4.93229e-10	0.00014748	0.0823285	0.636535	0.762704	0.823417	0.0392513	0.000696292	6.88494	7.04262	7.22449	7.26453	7.26076	7.35956	7.4242	p18.5
244	1.21225e-07	0.000174054	0.0127972	0.226531	0.44881	0.787604	0.0899682	0.00500505	7.39925	7.32461	7.25071	7.23545	7.18064	7.10282	7.063	p10.5
245	1.5127e-09	9.44095e-12	1.09008e-05	0.393924	0.494547	0.89416	0.127334	0.001003	7.07689	6.96778	6.85934	6.84746	6.80594	6.72968	6.61568	p10.5
246	0.914877	N/A	N/A	N/A	N/A	N/A	N/A	N/A	5.82681	5.77309	5.8243	5.81411	5.83046	5.81385	5.79755	p_non
247	0.062169	N/A	N/A	N/A	N/A	N/A	N/A	N/A	4.72032	4.72961	4.7809	4.71631	4.77635	4.77148	4.79941	p_non
248	0.0747266	N/A	N/A	N/A	N/A	N/A	N/A	N/A	6.4669	6.43388	6.52788	6.51017	6.37265	6.4108	6.24266	p_non
249	7.46006e-05	0.0416863	0.00483737	0.22066	0.168258	0.191153	0.0227843	0.00653959	6.49562	6.57635	6.55193	6.11021	6.12443	6.05211	6.01262	p11.5
250	1.07145e-06	0.0105565	0.000225693	0.0994903	0.156429	0.597677	0.349108	0.000114043	7.66297	7.77038	7.64737	7.64085	7.589	7.4757	7.20859	p11.5
251	0.111815	N/A	N/A	N/A	N/A	N/A	N/A	N/A	6.88326	6.99068	7.00614	7.1362	7.12487	7.0656	7.04584	p_non
252	0.642735	N/A	N/A	N/A	N/A	N/A	N/A	N/A	7.78339	7.78422	7.75393	7.73541	7.76075	7.7578	7.80022	p_non
253	3.66828e-10	0.0130909	0.000832736	0.0830584	0.195687	0.792719	0.0926072	3.10092e-08	5.73355	5.78652	5.82081	5.83251	5.86157	5.92412	6.03173	p18.5
254	0.0548526	N/A	N/A	N/A	N/A	N/A	N/A	N/A	4.02021	4.01559	4.05334	4.03576	4.05003	4.05575	4.05034	p_non
255	0.211912	N/A	N/A	N/A	N/A	N/A	N/A	N/A	5.46214	5.46483	5.51751	5.4673	5.48075	5.46489	5.44418	p_non
256	0.0114471	0.313973	0.24857	0.237827	0.943818	0.555004	0.608537	0.00310234	6.1866	6.21803	6.3395	6.13483	6.06689	6.07691	5.93936	p_non
257	0.0251569	0.000316651	0.0803626	0.952149	0.347288	0.349108	0.270097	0.415653	7.70745	7.77122	7.80809	7.83897	7.77316	7.8654	7.83934	p_non
258	0.00184428	0.000534465	0.0371832	0.92272	0.208303	0.561787	0.768852	0.0206067	6.90233	6.92169	6.94781	6.91918	6.93402	6.95366	7.00806	p18.5
259	0.212573	N/A	N/A	N/A	N/A	N/A	N/A	N/A	8.07047	8.1652	8.15461	8.23325	8.20447	8.1856	8.16324	p_non
260	0.0155806	0.0527851	0.187775	0.702314	0.561458	0.380865	0.308714	0.542614	9.12497	9.08501	8.97476	9.02709	8.94345	8.95019	8.96793	p_non
261	0.728992	N/A	N/A	N/A	N/A	N/A	N/A	N/A	6.32093	6.33834	6.33687	6.2736	6.37588	6.34553	6.32785	p_non
262	1.31298e-08	7.76391e-06	0.0316874	0.00587232	0.155817	0.305973	0.060481	0.00224496	6.36325	6.41931	6.40819	6.4354	6.45178	6.55207	6.66923	p18.5
263	0.553721	N/A	N/A	N/A	N/A	N/A	N/A	N/A	5.60742	5.62118	5.62714	5.57377	5.68157	5.56965	5.58109	p_non
264	0.000441389	0.0181367	0.00288831	0.66771	0.915699	0.985474	0.390904	0.00928153	5.53132	5.42092	5.32892	5.29238	5.30306	5.2419	5.18398	p10.5
265	9.20401e-06	0.0162473	0.219464	0.30487	0.239004	0.478516	0.205203	0.0116535	8.98779	8.95843	8.8999	8.89654	8.80411	8.7934	8.74213	p10.5
266	0.0881087	N/A	N/A	N/A	N/A	N/A	N/A	N/A	7.5562	7.58019	7.64536	7.61134	7.57943	7.57669	7.45644	p_non
267	0.00552415	0.00130694	0.820481	0.0894564	0.950593	0.549456	0.377489	0.0213174	8.04543	8.12267	8.04971	8.13272	8.08321	8.17706	8.24778	p18.5
268	0.461646	N/A	N/A	N/A	N/A	N/A	N/A	N/A	7.33659	7.41787	7.36953	7.36025	7.36237	7.37295	7.4165	p_non
269	0.000143536	0.00533829	0.0239546	0.881891	0.699676	0.439221	0.0367072	0.0823626	8.61343	8.63397	8.50423	8.51804	8.46487	8.43335	8.4268	p11.5
270	0.00677741	0.225631	0.328669	0.0894564	0.903459	0.457218	0.534112	0.0676897	9.20855	9.21424	9.1572	9.24312	9.21039	9.28923	9.40107	p_non
271	4.37951e-08	6.56108e-05	0.0314013	0.0753206	0.180733	0.926808	0.0451511	0.00270967	6.24382	6.24323	6.29141	6.28806	6.33063	6.37538	6.4328	p18.5
272	5.15482e-13	2.64043e-10	5.68219e-06	0.0158344	0.439371	0.630173	0.00860202	0.000629875	6.52032	6.60845	6.71214	6.77861	6.79475	6.95556	7.11296	p18.5
273	0.866859	N/A	N/A	N/A	N/A	N/A	N/A	N/A	4.4804	4.47048	4.53343	4.48419	4.54743	4.49638	4.49097	p_non
274	0.307788	N/A	N/A	N/A	N/A	N/A	N/A	N/A	5.77773	5.81598	5.85566	5.74984	5.77707	5.77347	5.76787	p_non
275	0.622922	N/A	N/A	N/A	N/A	N/A	N/A	N/A	7.49893	7.53858	7.53706	7.55158	7.50854	7.54047	7.55778	p_non
276	0.372701	N/A	N/A	N/A	N/A	N/A	N/A	N/A	8.10754	8.10414	8.07343	8.07326	8.01012	8.04768	8.08111	p_non
277	0.0156971	0.00473707	0.06979	0.856251	0.368974	0.861971	0.188968	0.421199	4.5726	4.55697	4.64774	4.60624	4.64849	4.69132	4.67766	p_non
278	0.618145	N/A	N/A	N/A	N/A	N/A	N/A	N/A	5.31847	5.3063	5.32449	5.30484	5.35016	5.31523	5.33354	p_non
279	0.0104344	7.27606e-07	0.0641113	0.483497	0.00223301	0.341451	0.292851	0.0877881	5.93055	5.88837	5.83922	5.68242	5.85116	5.7324	5.73157	p10.5
280	6.51812e-09	6.47497e-06	0.00130043	0.263648	0.663668	0.589191	0.053288	0.000353792	6.59975	6.54525	6.49671	6.47053	6.43719	6.39589	6.36582	p10.5
281	1.29617e-10	5.67026e-10	0.00263043	0.124935	0.449933	0.80039	0.000212238	3.84735e-05	9.27803	9.1497	9.05197	9.00602	8.9113	8.74081	8.66144	p10.5
282	0.810139	N/A	N/A	N/A	N/A	N/A	N/A	N/A	4.92301	4.88506	4.96431	4.9255	4.96614	4.94154	4.92026	p_non
283	0.415461	N/A	N/A	N/A	N/A	N/A	N/A	N/A	7.07058	7.11431	7.13053	7.12105	7.05426	7.12427	7.15557	p_non
284	0.963413	N/A	N/A	N/A	N/A	N/A	N/A	N/A	5.40764	5.50022	5.41181	5.34098	5.45601	5.42257	5.42701	p_non
285	0.0675422	N/A	N/A	N/A	N/A	N/A	N/A	N/A	6.18521	6.22857	6.27786	6.26506	6.36205	6.29696	6.3232	p_non
286	0.489177	N/A	N/A	N/A	N/A	N/A	N/A	N/A	6.04071	6.04074	6.16468	6.06045	6.19337	6.11428	6.10973	p_non
287	1.18268e-13	9.11877e-07	0.000110897	0.140823	0.633756	0.991045	0.000414772	7.74224e-08	6.35902	6.13337	5.85583	5.69557	5.73543	5.49294	5.38048	p10.5
288	2.4251e-12	2.7671e-06	0.00305036	0.00825771	0.368927	0.371194	0.0132514	1.2147e-06	7.78752	7.87231	7.95552	8.07148	8.06766	8.31478	8.53625	p18.5
289	0.963405	N/A	N/A	N/A	N/A	N/A	N/A	N/A	7.78432	7.78432	7.72431	7.75238	7.73751	7.7245	7.79868	p_non
290	0.067956	N/A	N/A	N/A	N/A	N/A	N/A	N/A	6.26289	6.28529	6.38716	6.29328	6.39984	6.39212	6.4	p_non
291	9.47873e-12	3.51271e-10	0.0139288	0.0595645	0.803379	0.891308	0.0299782	3.32163e-08	6.19805	6.2071	6.27617	6.33792	6.33498	6.39889	6.43553	p18.5
292	0.509719	N/A	N/A	N/A	N/A	N/A	N/A	N/A	8.90723	8.93936	8.92737	8.99228	8.92905	8.93108	8.95764	p_non
293	0.0169153	0.00956221	0.146431	0.549191	0.851012	0.229175	0.553915	0.776439	5.29142	5.35667	5.38117	5.41005	5.46728	5.42293	5.41733	p_non
294	0.573083	N/A	N/A	N/A	N/A	N/A	N/A	N/A	5.85464	5.81955	5.84227	5.81173	5.84815	5.82795	5.86494	p_non
295	0.1174	N/A	N/A	N/A	N/A	N/A	N/A	N/A	4.62692	4.57579	4.62212	4.59235	4.61777	4.58662	4.56783	p_non
296	0.00337609	0.0812288	0.0192024	0.757563	0.274609	0.271506	0.102187	0.0232018	5.70143	5.67169	5.559	5.52526	5.62358	5.52121	5.51734	p_non
297	0.00162571	0.000446015	0.195926	0.264951	0.461923	0.237833	0.198344	0.0145549	6.79655	6.82205	6.82361	6.90358	6.80671	6.9188	6.98627	p18.5
298	0.0131095	6.89833e-07	0.168185	0.37222	0.386277	0.415285	0.399362	0.281484	9.51534	9.58948	9.56987	9.7053	9.6724	9.66894	9.68859	p_non
299	0.00353836	8.3241e-06	0.150465	0.872197	0.119551	0.825986	0.308686	0.130385	6.97704	6.95868	6.894	6.94285	6.88552	6.87145	6.83299	p10.5
300	0.691265	N/A	N/A	N/A	N/A	N/A	N/A	N/A	7.18371	7.31696	7.42508	7.52914	7.40511	7.39412	7.34442	p_non
301	0.0315728	0.000497779	0.00209603	0.314048	0.587285	0.429863	0.240387	0.827422	6.08399	6.11967	6.33164	6.22616	6.32842	6.33612	6.28199	p_non
302	0.172028	N/A	N/A	N/A	N/A	N/A	N/A	N/A	7.69638	7.65874	7.62575	7.64513	7.60163	7.59615	7.63606	p_non
303	0.0164164	0.0461037	0.429384	0.452416	0.892842	0.783833	0.687495	0.0166945	6.64983	6.63315	6.65092	6.68148	6.6777	6.71155	6.77647	p18.5
304	1.48541e-12	0.00251284	1.12904e-07	0.0276142	0.690168	0.581635	0.00206069	9.98044e-07	6.19697	6.2919	6.37739	6.51881	6.52614	6.63611	6.67793	p18.5
305	0.19026	N/A	N/A	N/A	N/A	N/A	N/A	N/A	8.35765	8.40721	8.43122	8.43818	8.38833	8.37895	8.34272	p_non
306	0.0203755	0.0166745	0.859567	0.822897	0.827422	0.394129	0.523515	0.246328	8.4324	8.53615	8.53539	8.52954	8.51696	8.57532	8.62582	p_non
307	0.00299918	0.0178636	0.0812493	0.778374	0.719991	0.37919	0.0789671	0.188003	9.19936	9.23253	9.16073	9.16286	9.12445	9.10892	9.10928	p_non
308	2.4251e-12	3.47648e-11	3.07252e-06	0.0541829	0.927228	0.557969	0.0163674	0.00012422	6.45258	6.5692	6.71232	6.8268	6.87502	6.995	7.08007	p18.5
309	0.201494	N/A	N/A	N/A	N/A	N/A	N/A	N/A	5.34595	5.35875	5.43226	5.40074	5.44735	5.41282	5.41029	p_non
310	0.0131095	0.159164	0.579796	0.0031714	0.975587	0.409076	0.431492	0.149454	5.40133	5.52882	5.35277	5.49668	5.57309	5.5373	5.56663	p_non
311	0.834298	N/A	N/A	N/A	N/A	N/A	N/A	N/A	6.83902	6.78608	6.78829	6.76912	6.7599	6.77812	6.81945	p_non
312	0.000698553	1.49697e-06	0.0501912	0.725939	0.114272	0.613395	0.478488	0.132369	7.78935	7.93771	7.99363	8.07081	7.98796	8.06941	8.11645	p_non
313	0.0165902	0.0134531	0.348438	0.275279	0.200556	0.565129	0.503705	0.19351	8.09745	8.16889	8.13112	8.24484	8.16172	8.25635	8.28833	p_non
314	0.112376	N/A	N/A	N/A	N/A	N/A	N/A	N/A	4.9738	4.96784	5.05547	4.98371	5.06285	5.05033	5.06393	p_non
315	0.810138	N/A	N/A	N/A	N/A	N/A	N/A	N/A	5.25507	5.26721	5.31291	5.23964	5.30193	5.28039	5.24243	p_non
316	0.000562606	0.0222769	0.0359385	0.997986	0.135921	0.89416	0.222987	0.0456057	8.96711	9.01215	8.87181	8.93794	8.88149	8.79341	8.75565	p11.5
317	2.37362e-06	0.0144495	0.0698021	0.216774	0.985474	0.908481	0.0327909	4.66805e-05	4.73891	4.6895	4.715	4.63223	4.62784	4.56563	4.53486	p10.5
318	0.423422	N/A	N/A	N/A	N/A	N/A	N/A	N/A	7.9785	8.02888	8.006	8.05591	8.00884	8.04802	8.04258	p_non
319	0.143239	N/A	N/A	N/A	N/A	N/A	N/A	N/A	7.89535	7.92877	7.89623	7.89035	7.88455	7.86526	7.88095	p_non
320	0.160376	N/A	N/A	N/A	N/A	N/A	N/A	N/A	8.16294	8.24934	8.2192	8.28133	8.22797	8.2592	8.26802	p_non
321	0.0424872	0.000243503	0.00753084	0.158042	0.897857	0.932752	0.317408	0.625183	6.16058	6.19056	6.07566	6.09715	6.10461	6.06416	6.0831	p11.5
322	0.0408235	0.884255	0.0243777	0.330795	0.480469	0.512148	0.84642	0.0359571	6.47715	6.60372	6.55347	6.41446	6.50589	6.45746	6.35647	p11.5
323	3.0689e-10	3.54557e-11	0.00136108	0.0514064	0.892499	0.679917	0.0370045	0.0037541	7.59989	7.53552	7.41378	7.34087	7.30398	7.21984	7.1566	p10.5
324	0.0828102	N/A	N/A	N/A	N/A	N/A	N/A	N/A	5.122	5.11425	5.11503	5.05168	5.06621	5.06595	5.01916	p_non
325	0.0229833	0.0894157	0.177271	0.642117	0.493883	0.510219	0.223591	0.461923	5.05521	5.04033	5.06727	5.06419	5.10239	5.11297	5.11167	p_non
326	0.00243573	1.22829e-07	0.0264446	0.600604	0.0294791	0.587285	0.406346	0.209661	6.87054	6.96979	7.02868	7.1296	7.02004	7.10701	7.13457	p_non
327	2.22769e-09	1.62107e-07	1.64515e-05	0.0316874	0.330795	0.980323	0.142402	0.00266344	8.88134	8.86591	8.68859	8.61279	8.51653	8.32997	8.09586	p10.5
328	0.555377	N/A	N/A	N/A	N/A	N/A	N/A	N/A	6.027	6.06032	5.98181	6.04193	6.17551	6.1217	6.12843	p_non
329	0.4992	N/A	N/A	N/A	N/A	N/A	N/A	N/A	4.04965	4.03173	4.05557	4.0285	4.05222	4.02137	4.03471	p_non
330	0.966754	N/A	N/A	N/A	N/A	N/A	N/A	N/A	8.69902	8.74835	8.75995	8.76174	8.72053	8.70296	8.75532	p_non
331	7.40553e-07	6.23018e-09	1.72865e-06	0.827422	0.604094	0.177787	0.583029	0.00111839	4.66573	4.70812	4.80978	4.79633	4.86688	4.83257	4.90218	p18.5
332	0.00731978	0.00410551	2.01779e-06	0.865814	0.437679	0.942612	0.444558	0.231608	8.34006	8.45898	8.22822	8.28026	8.23289	8.17504	8.1273	p11.5
333	5.71152e-09	0.00145913	0.0316874	0.288744	0.515795	0.56973	0.0294957	0.00118123	6.83084	6.75439	6.68634	6.66969	6.61894	6.55261	6.53721	p10.5
334	0.0205628	0.0544685	0.640891	0.390904	0.83094	0.343375	0.709659	0.0129434	8.68662	8.72276	8.69696	8.75232	8.68048	8.76644	8.86198	p18.5
335	1.70481e-10	4.75526e-13	0.0144495	0.184277	0.675388	0.491009	0.000605753	0.000947917	8.26579	8.10873	8.00044	7.97099	7.90036	7.81902	7.78108	p10.5
336	0.000730338	0.0990875	0.147034	0.26535	0.351996	0.108107	0.407342	0.0114811	7.28936	7.27183	7.29698	7.37545	7.28294	7.38419	7.47167	p18.5
337	0.0469346	0.968108	0.299366	0.177271	0.735596	0.502512	0.694735	0.0457921	7.92528	7.89402	7.84754	7.93649	7.88349	7.94585	8.02207	p18.5
338	2.21187e-08	0.000126313	0.132257	0.205415	0.451888	0.371194	0.0234985	0.00356872	8.26369	8.08366	8.03161	8.01313	7.90524	7.87245	7.82734	p10.5
339	0.418531	N/A	N/A	N/A	N/A	N/A	N/A	N/A	4.66878	4.66472	4.73645	4.67151	4.78413	4.713	4.71665	p_non
340	5.60451e-06	0.000315487	0.229884	0.207321	0.322928	0.622542	0.0515505	0.0753206	5.2309	5.27471	5.29194	5.29914	5.34809	5.37657	5.40645	p_non
341	0.0478042	0.108869	0.677324	0.220632	0.696546	0.832972	0.314575	0.447221	5.92708	5.97907	5.96021	5.97161	5.98297	6.06605	6.0395	p_non
342	0.0107821	0.00230131	0.0447064	0.581635	0.2238	0.757737	0.518336	0.344231	7.53901	7.53124	7.48084	7.49973	7.44387	7.41939	7.39745	p10.5
343	0.00769796	0.0143024	0.292906	0.367438	0.54593	0.207147	0.572153	0.0814989	5.68502	5.64761	5.65544	5.59124	5.66698	5.59998	5.52043	p10.5
344	0.126593	N/A	N/A	N/A	N/A	N/A	N/A	N/A	7.1515	7.21692	7.2229	7.24649	7.18931	7.25579	7.27415	p_non
345	1.37793e-14	5.25861e-13	4.10142e-05	0.0812288	0.783545	0.382215	0.000336393	8.14897e-06	6.21777	6.3531	6.55806	6.62449	6.69391	6.81252	6.89136	p18.5
346	0.6155	N/A	N/A	N/A	N/A	N/A	N/A	N/A	6.32334	6.45118	6.58638	6.58464	6.5201	6.53686	6.4745	p_non
347	1.88752e-05	0.0133425	1.31119e-05	0.495615	0.816418	0.979119	0.38152	0.013611	6.00996	6.03994	5.84248	5.81484	5.7968	5.71444	5.56948	p11.5
348	0.917291	N/A	N/A	N/A	N/A	N/A	N/A	N/A	5.44966	5.45386	5.50763	5.43233	5.55114	5.4436	5.45084	p_non
349	0.87368	N/A	N/A	N/A	N/A	N/A	N/A	N/A	4.8554	4.84199	4.88175	4.83168	4.88305	4.85312	4.84584	p_non
350	0.296662	N/A	N/A	N/A	N/A	N/A	N/A	N/A	7.47087	7.58763	7.4958	7.54926	7.52653	7.54366	7.56157	p_non
351	7.77235e-13	6.986e-10	3.29311e-06	0.119824	0.916767	0.834303	0.00174208	2.08038e-06	7.7016	7.84182	7.91596	8.04854	8.05349	8.18462	8.2822	p18.5
352	3.06246e-05	0.0528859	0.325833	0.130385	0.273451	0.614552	0.323258	0.0164694	8.13578	8.07595	8.07879	8.07157	7.97954	7.93898	7.8632	p_non
353	0.0806124	N/A	N/A	N/A	N/A	N/A	N/A	N/A	7.77648	7.71529	7.70026	7.74726	7.69817	7.80567	7.87237	p_non
354	4.07503e-11	2.43011e-05	0.000193717	0.127217	0.94691	0.541667	0.000199085	0.00287793	7.99132	7.93231	7.82584	7.77224	7.74636	7.66751	7.63766	p10.5
355	2.19135e-11	3.02951e-11	1.7798e-05	0.323258	0.75294	0.717194	0.0127431	5.07207e-06	6.99685	7.07259	7.15387	7.19078	7.17171	7.25299	7.29443	p18.5
356	3.05567e-06	4.47923e-07	0.0546642	0.307634	0.649783	0.314048	0.0628305	0.0493063	7.03504	6.97963	6.95534	6.92253	6.87113	6.85292	6.85319	p10.5
357	0.000286283	0.000789911	0.015425	0.562138	0.201815	0.672208	0.869855	0.0239546	7.01678	7.02365	7.11534	7.07723	7.12342	7.10951	7.17887	p18.5
358	0.965395	N/A	N/A	N/A	N/A	N/A	N/A	N/A	7.93236	7.9668	7.76411	7.90008	7.90563	7.86721	7.9026	p_non
359	3.66828e-10	0.000524256	3.2944e-08	0.129339	0.855535	0.479866	0.000133271	0.0303229	7.55669	7.51164	7.42174	7.38357	7.36984	7.31128	7.31824	p10.5
360	0.903551	N/A	N/A	N/A	N/A	N/A	N/A	N/A	5.75681	5.91785	5.82286	5.76542	5.7749	5.79997	5.83168	p_non
361	2.67335e-10	2.69461e-05	0.0213174	0.0216456	0.300565	0.833535	0.00436086	1.00436e-05	8.91551	8.8553	8.81303	8.76509	8.67555	8.55318	8.45047	p10.5
362	0.102455	N/A	N/A	N/A	N/A	N/A	N/A	N/A	6.44493	6.46285	6.60063	6.48986	6.63461	6.5919	6.59187	p_non
363	0.243161	N/A	N/A	N/A	N/A	N/A	N/A	N/A	7.27628	7.25544	7.24775	7.21746	7.13962	7.23665	7.21649	p_non
364	0.28706	N/A	N/A	N/A	N/A	N/A	N/A	N/A	7.94795	7.9416	7.98971	8.01566	7.94411	7.97042	8.03939	p_non
365	0.382202	N/A	N/A	N/A	N/A	N/A	N/A	N/A	5.90168	5.9578	5.84613	5.89979	5.9979	5.98042	5.98131	p_non
366	0.0424872	0.0446442	0.0263395	0.853394	0.403429	0.332516	0.938492	0.45119	7.44841	7.4508	7.36895	7.38645	7.2909	7.35435	7.31304	p11.5
367	1.57815e-10	2.33828e-09	3.84748e-07	0.150405	0.903885	0.687495	0.0192751	0.000424295	6.33581	6.36001	6.44716	6.51978	6.50713	6.63106	6.69256	p18.5
368	0.163696	N/A	N/A	N/A	N/A	N/A	N/A	N/A	5.03143	5.09518	5.10867	5.11762	5.13898	5.12849	5.1106	p_non
369	0.00699381	0.130095	0.0527851	0.180536	0.393751	0.335498	0.119341	0.00752923	5.99961	6.00033	5.98629	5.90976	6.01407	5.88634	5.84803	p_non
370	1.48756e-07	4.63421e-08	1.80631e-07	0.778669	0.76377	0.915699	0.114209	0.00608708	5.59156	5.58156	5.41338	5.41442	5.39707	5.33118	5.28285	p10.5
371	9.77309e-07	1.53165e-07	0.00867201	0.461923	0.902644	0.94691	0.0114387	0.081873	7.72656	7.63198	7.57775	7.55094	7.55345	7.4996	7.47535	p10.5
372	0.132656	N/A	N/A	N/A	N/A	N/A	N/A	N/A	6.80994	6.82519	6.87782	6.83553	6.81999	6.90414	6.8959	p_non
373	0.741532	N/A	N/A	N/A	N/A	N/A	N/A	N/A	7.22077	7.23704	7.24325	7.26397	7.28829	7.21974	7.25646	p_non
374	8.89562e-09	9.09504e-07	0.000889988	0.100367	0.880779	0.528929	0.130754	0.0302577	5.76174	5.829	5.91726	5.98395	6.02207	6.07231	6.16704	p18.5
375	0.293748	N/A	N/A	N/A	N/A	N/A	N/A	N/A	5.07384	5.00743	5.03357	5.03354	5.02966	5.0195	4.96978	p_non
376	0.297834	N/A	N/A	N/A	N/A	N/A	N/A	N/A	4.84973	4.81205	4.86506	4.79994	4.88078	4.79589	4.8009	p_non
377	4.93855e-11	2.34336e-09	0.000584203	0.147704	0.404257	0.554531	0.0122327	0.00015642	7.387	7.50356	7.57503	7.59457	7.66659	7.71404	7.80943	p18.5
378	5.16594e-11	0.000133271	0.000261339	0.0112168	0.564457	0.550428	0.036761	0.00100021	8.09504	8.23769	8.28774	8.38201	8.38942	8.57561	8.74702	p18.5
379	2.31688e-10	3.10225e-10	0.000561114	0.207321	0.321062	0.92817	0.00449852	0.000318274	8.36202	8.27161	8.09184	8.09612	8.00903	7.8367	7.75496	p10.5
380	3.99215e-08	0.000971267	0.0070192	0.146131	0.562138	0.326447	0.0219491	9.09504e-07	8.17005	8.21085	7.90703	6.40852	6.22845	5.8233	5.2251	p11.5
381	0.42352	N/A	N/A	N/A	N/A	N/A	N/A	N/A	5.51808	5.51033	5.53757	5.48542	5.52602	5.4964	5.49585	p_non
382	5.25131e-10	1.54975e-06	0.0023563	0.254242	0.950593	0.347288	0.0163962	0.0166745	7.71805	7.67054	7.57697	7.54923	7.52186	7.4901	7.44844	p10.5
383	0.8293	N/A	N/A	N/A	N/A	N/A	N/A	N/A	7.48182	7.41372	7.44446	7.42979	7.40302	7.44741	7.44602	p_non
384	0.833891	N/A	N/A	N/A	N/A	N/A	N/A	N/A	8.81221	8.93879	8.8374	8.93735	8.88324	8.85713	8.84434	p_non
385	8.57984e-07	1.99924e-06	0.00448125	0.0807978	0.812706	0.451688	0.136673	0.0197595	8.79975	8.88797	8.90165	8.99531	8.97464	9.12513	9.25237	p18.5
386	0.485039	N/A	N/A	N/A	N/A	N/A	N/A	N/A	8.29378	8.33997	8.26732	8.31267	8.24821	8.24717	8.28956	p_non
387	0.750424	N/A	N/A	N/A	N/A	N/A	N/A	N/A	7.41753	7.53804	7.3292	7.42229	7.3736	7.38683	7.40164	p_non
388	0.980085	N/A	N/A	N/A	N/A	N/A	N/A	N/A	7.72879	7.83124	7.74405	7.76244	7.7016	7.75803	7.78077	p_non
389	5.16594e-11	7.39424e-08	0.000119643	0.0447064	0.990905	0.84642	0.0141282	5.68219e-06	7.8103	8.00119	8.01113	8.2097	8.19351	8.39586	8.5363	p18.5
390	3.17989e-13	4.01862e-06	3.71233e-05	0.0236496	0.614842	0.952149	0.00660347	5.96974e-06	7.47629	7.32938	7.21502	7.13552	7.09878	6.94273	6.82383	p10.5
391	0.0035204	0.00181645	0.432324	0.0215132	0.781907	0.614552	0.115611	0.0457801	7.59422	7.73151	7.6239	7.72045	7.66801	7.7823	7.79842	p18.5
392	0.000714919	1.51753e-05	0.0070192	0.86116	0.593685	0.72212	0.0786468	0.184376	9.95051	9.92673	9.80258	9.84181	9.78842	9.7385	9.75366	p10.5
393	2.34676e-10	0.0123353	0.0233349	0.0707684	0.860998	0.203198	0.261411	1.94436e-05	7.57543	7.50392	7.46569	7.41296	7.37007	7.36521	7.28893	p10.5
394	1.38241e-07	3.64114e-09	7.3537e-07	0.146431	0.605006	0.713027	0.181666	0.0381197	7.89185	7.87467	7.70391	7.67213	7.61484	7.52217	7.46447	p10.5
395	0.000128681	8.69681e-13	0.0219818	0.985474	0.8018	0.415653	0.0551009	0.190099	8.61501	8.48882	8.37668	8.393	8.31929	8.29901	8.31378	p10.5
396	0.0200319	0.167966	0.735873	0.06979	0.487146	0.621392	0.882985	0.0702626	7.24577	7.20579	7.31136	7.26363	7.15445	7.17415	7.01774	p_non
397	0.0190196	0.843078	0.952149	0.142496	0.787038	0.480469	0.529871	0.00310116	4.7799	4.77709	4.82181	4.78188	4.79341	4.75856	4.71693	p_non
398	5.16594e-11	1.84243e-06	0.00010312	0.00631311	0.354089	0.133214	0.0409472	1.24551e-08	6.22719	6.29828	6.32462	6.41775	6.38866	6.57335	6.79262	p18.5
399	0.761423	N/A	N/A	N/A	N/A	N/A	N/A	N/A	5.21683	5.21255	5.237	5.18782	5.24903	5.21559	5.23275	p_non
400	5.16594e-11	4.39549e-08	0.00016536	0.00430536	0.726507	0.847399	0.0432321	1.01206e-08	4.70382	4.84502	4.93584	5.11114	5.17188	5.35061	5.52773	p18.5
401	0.580126	N/A	N/A	N/A	N/A	N/A	N/A	N/A	5.6915	5.68715	5.73218	5.69127	5.71742	5.69833	5.68529	p_non
402	0.0314482	3.45507e-05	0.926808	0.323041	0.232307	0.870791	0.739135	0.224161	5.44533	5.38961	5.41727	5.36132	5.39177	5.37668	5.3549	p10.5
403	7.3068e-05	0.000428483	0.132247	0.472303	0.769559	0.509817	0.0158029	0.110478	7.74724	7.64727	7.62331	7.60952	7.56188	7.53494	7.53942	p10.5
404	0.670108	N/A	N/A	N/A	N/A	N/A	N/A	N/A	7.94282	7.91957	7.86788	7.87571	7.89699	7.89254	7.94232	p_non
405	0.922436	N/A	N/A	N/A	N/A	N/A	N/A	N/A	4.51176	4.48668	4.55721	4.54889	4.51505	4.538	4.52039	p_non
406	1.47098e-07	4.13483e-05	0.00111889	0.0689737	0.114123	0.675298	0.20434	0.00142451	8.61454	8.64254	8.47149	8.44362	8.32687	8.03869	7.6415	p11.5
407	0.0403503	0.000248178	0.010108	0.654527	0.92272	0.7656	0.581635	0.452264	5.83905	6.08681	6.44418	6.67286	6.49544	7.00413	7.15379	p_non
408	0.000104851	8.48034e-06	0.0823626	0.891347	0.31049	0.420569	0.282784	0.0749073	5.45847	5.48303	5.59588	5.55575	5.65247	5.65011	5.68558	p_non
409	4.77864e-06	3.63465e-05	0.000400943	0.0765392	0.44881	0.866106	0.266453	0.0234385	8.33216	8.33033	8.16884	8.00293	7.7925	7.52854	7.17965	p10.5
410	0.681913	N/A	N/A	N/A	N/A	N/A	N/A	N/A	5.85749	5.89916	5.88506	5.81723	5.9018	5.86367	5.84172	p_non
411	0.00880404	0.0807673	0.549828	0.174412	0.789852	0.988882	0.988882	0.0827786	8.61168	8.62382	8.59783	8.6249	8.63063	8.63051	8.68013	p_non
412	2.30435e-10	1.46172e-06	0.00129741	0.0309601	0.710078	0.857736	0.0387294	0.00660347	8.17443	8.29898	8.32815	8.41399	8.42387	8.53951	8.65787	p18.5
413	0.145805	N/A	N/A	N/A	N/A	N/A	N/A	N/A	5.47658	5.44859	5.46849	5.39279	5.42467	5.41873	5.43526	p_non
414	0.175322	N/A	N/A	N/A	N/A	N/A	N/A	N/A	5.61223	5.61938	5.60054	5.59829	5.60414	5.58537	5.59278	p_non
415	0.00108416	0.00320378	0.149601	0.167437	0.461923	0.794357	0.249792	0.0238246	8.11639	8.14876	8.12684	8.22769	8.18485	8.25556	8.28768	p18.5
416	1.87899e-06	1.4474e-08	6.02247e-06	0.470599	0.933652	0.863367	0.0820253	0.00309702	5.52268	5.50355	5.2552	5.27968	5.29685	5.20032	5.15145	p10.5
417	0.652731	N/A	N/A	N/A	N/A	N/A	N/A	N/A	7.03422	7.13829	7.01412	7.09073	7.01828	7.06026	7.03362	p_non
418	0.980085	N/A	N/A	N/A	N/A	N/A	N/A	N/A	7.69205	7.66348	7.65161	7.65697	7.58511	7.65243	7.69712	p_non
419	6.35172e-12	3.90982e-09	3.24169e-05	0.122044	0.286529	0.388791	0.0023362	0.00166427	5.96488	5.89693	5.8366	5.82419	5.76638	5.71717	5.69316	p10.5
420	0.151831	N/A	N/A	N/A	N/A	N/A	N/A	N/A	8.81282	8.87162	8.84967	8.91468	8.88452	8.9011	8.88676	p_non
421	0.175322	N/A	N/A	N/A	N/A	N/A	N/A	N/A	5.83555	5.88063	5.90662	5.85799	5.94789	5.81311	5.78821	p_non
422	0.111163	N/A	N/A	N/A	N/A	N/A	N/A	N/A	7.48015	7.35046	7.34022	7.36219	7.34483	7.4178	7.51173	p_non
423	0.0826756	N/A	N/A	N/A	N/A	N/A	N/A	N/A	7.9185	7.81817	7.87103	7.81196	7.79999	7.80827	7.82709	p_non
424	0.000126472	0.0382523	0.189927	0.390553	0.406346	0.340478	0.0627811	0.0830526	8.76481	8.69626	8.66249	8.672	8.56563	8.55668	8.54965	p10.5
425	0.357036	N/A	N/A	N/A	N/A	N/A	N/A	N/A	7.74784	7.77813	7.66982	7.68409	7.7208	7.66681	7.71653	p_non
426	0.128154	N/A	N/A	N/A	N/A	N/A	N/A	N/A	5.94791	5.83882	5.81688	5.8398	5.8477	5.82418	5.7778	p_non
427	0.00050592	1.10774e-05	0.0254626	0.761188	0.288145	0.951718	0.187964	0.0556768	8.93121	8.94887	8.79419	8.85944	8.81366	8.7373	8.71129	p11.5
428	0.829955	N/A	N/A	N/A	N/A	N/A	N/A	N/A	4.13116	4.0931	4.10784	4.09961	4.1259	4.10117	4.12205	p_non
429	0.0183581	0.00376705	0.768334	0.227732	0.618847	0.94556	0.963228	0.135921	5.5177	5.44905	5.49717	5.44519	5.45755	5.46037	5.41296	p10.5
430	0.320059	N/A	N/A	N/A	N/A	N/A	N/A	N/A	6.29237	6.28559	6.31167	6.22786	6.33429	6.23932	6.24077	p_non
431	0.115806	N/A	N/A	N/A	N/A	N/A	N/A	N/A	4.75794	4.74741	4.83074	4.76844	4.82848	4.8213	4.82091	p_non
432	2.31303e-06	4.7617e-05	0.000218365	0.391136	0.37919	0.726237	0.203198	0.0202593	7.71785	7.68585	7.57709	7.57523	7.50506	7.44701	7.38637	p10.5
433	3.79869e-10	2.77671e-07	0.000869773	0.150405	0.814752	0.44718	0.0213312	8.32237e-07	5.91073	5.8565	5.84358	5.78051	5.76833	5.74282	5.69865	p10.5
434	0.000714919	0.0232018	0.000269974	0.541948	0.0790931	0.890787	0.459908	0.0550699	7.30917	7.37488	7.41149	7.49367	7.43836	7.47277	7.51402	p_non
435	7.37615e-05	0.132369	0.0765392	0.124935	0.83094	0.500869	0.215104	0.000347378	5.23944	5.21594	5.22642	5.17707	5.20153	5.14619	5.11791	p_non
436	0.240496	N/A	N/A	N/A	N/A	N/A	N/A	N/A	8.9146	8.8839	8.86409	8.8805	8.79561	8.82123	8.86658	p_non
437	0.555571	N/A	N/A	N/A	N/A	N/A	N/A	N/A	7.13503	7.27229	7.20102	7.27739	7.19329	7.23721	7.23127	p_non
438	0.067956	N/A	N/A	N/A	N/A	N/A	N/A	N/A	5.90848	5.89431	5.892	5.82597	5.92968	5.82117	5.79927	p_non
439	6.94333e-08	2.51407e-06	0.000571453	0.478516	0.335498	0.58234	0.0374391	0.0129434	7.19938	7.13088	7.01109	7.02693	6.9449	6.87642	6.85497	p10.5
440	1.81116e-07	9.71571e-08	4.31201e-05	0.836438	0.2238	0.616926	0.0731966	0.00166496	6.78431	6.84114	6.95167	6.91727	6.98803	7.00471	7.06759	p18.5
441	8.29897e-11	0.00352172	2.26731e-05	0.140065	0.823355	0.54487	0.0131853	0.00685257	7.18274	7.14507	7.05573	6.99955	7.02366	6.92058	6.87293	p10.5
442	0.000126295	0.0223417	0.00235366	0.0954498	0.180547	0.957345	0.348015	0.0354818	7.20041	7.23063	7.18252	7.18467	7.11891	7.04031	6.94814	p11.5
443	0.968889	N/A	N/A	N/A	N/A	N/A	N/A	N/A	5.279	5.25457	5.31485	5.2603	5.30771	5.26372	5.28446	p_non
444	2.39326e-06	0.0208644	0.0289478	0.966062	0.605006	0.448174	0.00461135	0.0108563	8.78335	8.72235	8.59268	8.61679	8.56053	8.50839	8.50933	p10.5
445	2.77127e-08	0.00271443	0.0115571	0.401111	0.55884	0.83094	0.00422136	0.00131034	6.57767	6.52361	6.51347	6.49911	6.49294	6.44724	6.43311	p10.5
446	0.0229548	0.0848597	0.249926	0.213659	0.472303	0.178796	0.877439	0.281831	6.03596	6.0474	6.04229	5.98794	5.96912	6.00141	5.98813	p_non
447	0.97548	N/A	N/A	N/A	N/A	N/A	N/A	N/A	8.54792	8.5171	8.43248	8.46504	8.43253	8.46888	8.52795	p_non
448	0.912079	N/A	N/A	N/A	N/A	N/A	N/A	N/A	5.11182	5.10332	5.15907	5.13252	5.19692	5.15258	5.1017	p_non
449	0.485039	N/A	N/A	N/A	N/A	N/A	N/A	N/A	9.08635	9.12274	9.09712	9.14944	9.05348	9.08931	9.05603	p_non
450	0.000795705	0.000501851	0.210023	0.213212	0.941952	0.937304	0.303338	0.0332909	7.57014	7.63763	7.60078	7.67459	7.67552	7.73895	7.78513	p18.5
451	9.84817e-10	6.15112e-11	0.00194368	0.140997	0.581052	0.535558	0.0515505	0.0025075	6.87131	6.81573	6.77587	6.73895	6.70006	6.66289	6.62076	p10.5
452	8.02217e-10	4.38877e-07	0.00310116	0.0290932	0.0804289	0.765006	0.142783	0.000177669	5.59163	5.61524	5.69693	5.69666	5.75229	5.84549	6.02133	p18.5
453	3.73546e-05	0.00232604	0.010984	0.362758	0.780495	0.0843789	0.0348733	0.256776	7.6249	7.73986	7.74565	7.80671	7.8401	7.86159	7.83281	p16.5
454	0.157495	N/A	N/A	N/A	N/A	N/A	N/A	N/A	8.57316	8.56214	8.58137	8.63151	8.57973	8.66919	8.64541	p_non
455	7.96136e-07	7.95825e-09	0.107829	0.554531	0.725973	0.554336	0.237827	0.00364415	8.03997	8.06592	8.10084	8.11773	8.12472	8.13158	8.15207	p18.5
456	0.818318	N/A	N/A	N/A	N/A	N/A	N/A	N/A	4.66715	4.64201	4.6952	4.64375	4.69474	4.66553	4.64872	p_non
457	0.0180343	0.00982878	0.142472	0.391136	0.77513	0.926089	0.14065	0.219373	5.28575	5.28361	5.35292	5.32685	5.33335	5.35909	5.36253	p_non
458	0.757292	N/A	N/A	N/A	N/A	N/A	N/A	N/A	8.37852	8.40254	8.42272	8.40048	8.37525	8.35773	8.41435	p_non
459	0.000795464	5.95918e-07	0.0360955	0.747722	0.94691	0.32511	0.0403059	0.488357	8.4878	8.43291	8.34839	8.34057	8.28668	8.27538	8.30703	p10.5
460	0.149873	N/A	N/A	N/A	N/A	N/A	N/A	N/A	8.49304	8.51332	8.51016	8.56395	8.50009	8.56704	8.5771	p_non
461	0.460986	N/A	N/A	N/A	N/A	N/A	N/A	N/A	6.81942	6.72951	6.79487	6.75043	6.79132	6.80339	6.81306	p_non
462	0.000143263	0.0420692	0.219373	0.192905	0.104151	0.347657	0.443753	0.0900667	4.98538	5.06876	5.05952	5.04645	5.14224	5.13025	5.18207	p_non
463	1.67177e-10	0.000414926	0.00296369	0.0813593	0.630173	0.498326	0.00603059	0.0214709	8.93995	8.79574	8.67258	8.6369	8.5679	8.4605	8.43158	p10.5
464	0.0126888	0.00590382	0.108114	0.869855	0.34069	0.711911	0.247349	0.34069	8.60686	8.58479	8.50144	8.55526	8.48478	8.45459	8.4643	p10.5
465	0.984321	N/A	N/A	N/A	N/A	N/A	N/A	N/A	4.80732	4.76356	4.8084	4.79168	4.7961	4.79787	4.7941	p_non
466	1.29617e-10	0.00116425	0.000226103	0.305973	0.806104	0.450007	0.0309601	8.48034e-06	6.69335	6.76199	6.83555	6.88897	6.85796	6.94184	7.0401	p18.5
467	0.0301193	0.0925772	0.247445	0.543563	0.325267	0.526702	0.938492	0.241993	5.37977	5.38319	5.43806	5.41567	5.51276	5.45947	5.52295	p_non
468	1.62139e-09	4.81286e-10	3.1657e-10	0.521112	0.88976	0.820866	0.0090062	3.6903e-06	7.15443	7.168	6.69221	6.65083	6.67656	6.39291	6.25358	p11.5
469	0.0257907	0.341581	0.115254	0.517846	0.870466	0.990471	0.199641	0.447221	4.61045	4.57854	4.61543	4.62844	4.63265	4.6596	4.66789	p_non
470	4.88688e-06	2.45635e-10	0.00669984	0.620579	0.53901	0.42619	0.0451803	0.0161916	7.05337	6.97801	6.8817	6.88419	6.79965	6.76198	6.75835	p10.5
471	6.14239e-06	8.67169e-08	0.00111839	0.526702	0.223591	0.859567	0.266318	0.0353321	7.81728	7.801	7.60559	7.63838	7.54777	7.45527	7.35337	p10.5
472	0.00611318	0.0371832	0.00752923	0.286081	0.710078	0.371194	0.375294	0.0356652	8.33267	8.33148	8.34551	8.42148	8.33899	8.45761	8.51384	p18.5
473	0.00750138	2.43011e-05	0.00942586	0.776841	0.193659	0.512385	0.375066	0.45456	7.41998	7.38566	7.33366	7.35833	7.28391	7.26806	7.27522	p10.5
474	6.55566e-05	0.0143308	0.254242	0.0769813	0.943197	0.757563	0.181152	2.68052e-05	8.97832	9.0624	8.96118	9.10776	9.08345	9.17648	9.26506	p18.5
475	3.75786e-14	9.39423e-11	7.3537e-07	0.00748566	0.688904	0.849832	0.00347621	1.19527e-06	6.3032	6.55428	6.79542	7.10806	7.21029	7.60583	7.92499	p18.5
476	0.786751	N/A	N/A	N/A	N/A	N/A	N/A	N/A	5.93005	5.87648	5.87918	5.85556	5.87473	5.85683	5.90835	p_non
477	1.89495e-09	2.64043e-10	3.30735e-09	0.388891	0.656747	0.292215	0.0075504	0.00112356	7.00661	6.98051	6.86433	6.84334	6.78636	6.73031	6.72278	p10.5
478	0.0320322	9.61404e-06	0.254235	0.583329	0.209673	0.416017	0.820588	0.263648	5.92879	5.96108	6.06688	5.98762	6.12118	6.05821	6.09634	p_non
479	6.44096e-07	2.3814e-06	0.00469587	0.403429	0.2238	0.944438	0.12825	0.0121434	9.80815	9.78409	9.63822	9.67247	9.60145	9.47901	9.38511	p10.5
480	2.30313e-07	0.00117033	0.0107361	0.194078	0.257421	0.905284	0.0383326	0.00698937	8.50603	8.45776	8.36454	8.37479	8.28766	8.16434	8.11275	p10.5
481	0.586238	N/A	N/A	N/A	N/A	N/A	N/A	N/A	4.17963	4.16395	4.20331	4.16587	4.20206	4.17686	4.15697	p_non
482	0.968889	N/A	N/A	N/A	N/A	N/A	N/A	N/A	5.58644	5.54328	5.61303	5.54987	5.63544	5.57064	5.5702	p_non
483	0.0231789	0.000323103	0.0839193	0.44881	0.809165	0.58159	0.534558	0.341436	6.28473	6.51679	6.50341	6.6317	6.86211	6.9132	7.02003	p_non
484	0.00713168	0.000337297	0.0305042	0.323709	0.492696	0.491009	0.447385	0.37222	8.85573	8.79098	8.77542	8.74792	8.63303	8.61777	8.61171	p10.5
485	0.209701	N/A	N/A	N/A	N/A	N/A	N/A	N/A	4.83545	4.80809	4.91832	4.86352	4.93863	4.89627	4.89704	p_non
486	2.00722e-05	2.77671e-07	0.196549	0.0899682	0.713027	0.575738	0.24223	0.00267145	8.29571	8.37772	8.34188	8.4452	8.39884	8.49627	8.56151	p18.5
487	5.71152e-09	2.33787e-05	1.64648e-05	0.381314	0.966062	0.846276	0.023305	0.00201144	7.06545	7.06714	6.87612	6.84368	6.82815	6.7383	6.69726	p11.5
488	5.52361e-11	0.000761138	0.000116232	0.00512503	0.649032	0.386692	0.00292407	0.000191741	7.13049	7.07041	7.03947	7.00093	6.95496	6.91828	6.89745	p10.5
489	0.0422352	0.745667	0.55884	0.0681919	0.625403	0.628112	0.492207	0.228741	7.85374	7.84657	7.79997	7.83076	7.84474	7.89296	7.95369	p_non
490	0.00248144	0.000611657	0.0807978	0.665992	0.452264	0.315713	0.870844	0.0122327	5.38137	5.41362	5.33314	5.29276	5.35219	5.30979	5.22454	p_non
491	2.7951e-07	5.68219e-06	0.000600643	0.29198	0.601804	0.187291	0.0655345	5.3853e-05	7.84381	7.88741	7.92507	7.97267	7.92531	8.06851	8.18094	p18.5
492	0.0150452	0.00193173	0.366418	0.885721	0.191222	0.61399	0.767559	0.105262	5.47281	5.47833	5.53804	5.50361	5.55298	5.5412	5.57929	p_non
493	0.061261	N/A	N/A	N/A	N/A	N/A	N/A	N/A	8.3155	8.36324	8.23388	8.30285	8.24004	8.23242	8.21169	p_non
494	0.00894697	0.295204	0.94691	0.341581	0.616221	0.801205	0.459054	0.0823626	7.49309	7.3811	7.41268	7.40858	7.37844	7.36415	7.33224	p_non
495	0.869331	N/A	N/A	N/A	N/A	N/A	N/A	N/A	8.15749	8.13757	8.06845	8.11541	8.08059	8.10879	8.15045	p_non
496	0.0185299	1.11777e-09	0.0804289	0.89416	0.767451	0.135748	0.182903	0.170871	5.34999	5.47283	5.55546	5.54808	5.67864	5.65501	5.51863	p_non
497	0.000588819	0.0100039	0.00539319	0.996644	0.102451	0.49057	0.622523	0.00454992	7.18008	7.19556	7.07259	7.14409	7.12885	7.03755	6.86619	p11.5
498	2.55282e-09	0.000188632	0.000181154	0.689218	0.814752	0.81256	0.0164694	0.000173884	6.39004	6.31804	6.23462	6.23417	6.21768	6.1793	6.13113	p10.5
499	0.110218	N/A	N/A	N/A	N/A	N/A	N/A	N/A	7.63071	7.61592	7.72942	7.69805	7.71721	7.75127	7.71685	p_non
500	0.00084509	0.00797359	0.726739	0.687495	0.865617	0.715964	0.62153	0.134654	5.45805	5.3447	5.34208	5.32782	5.31032	5.30531	5.25572	p10.5
501	0.49061	N/A	N/A	N/A	N/A	N/A	N/A	N/A	4.76031	4.71296	4.7875	4.72634	4.79543	4.74046	4.71917	p_non
502	8.64577e-08	4.3883e-05	0.00222075	0.0570619	0.0758036	0.936734	0.229175	0.00183286	5.67229	5.67815	5.73692	5.73465	5.79736	5.84118	5.96887	p18.5
503	4.61287e-12	0.00603059	0.00268035	0.0481494	0.640343	0.92817	0.000633932	6.31867e-05	7.87218	7.76118	7.72873	7.64007	7.65292	7.56966	7.52827	p10.5
504	4.50569e-05	0.000183027	0.131466	0.0841444	0.872197	0.998882	0.309328	0.0239546	10.1957	10.3314	10.2547	10.3856	10.4031	10.488	10.6242	p18.5
505	2.21032e-09	0.00540226	0.149601	0.0658534	0.841998	0.526627	0.0174699	4.42341e-06	7.31967	7.26741	7.23023	7.14882	7.10659	7.05144	7.00224	p10.5
506	0.711607	N/A	N/A	N/A	N/A	N/A	N/A	N/A	9.04887	9.02402	9.01098	9.04366	8.98814	8.97918	9.04331	p_non
507	9.42213e-06	9.02906e-05	0.010619	0.88976	0.495705	0.814752	0.119309	0.0288253	5.91033	5.89042	5.78247	5.7998	5.76511	5.71659	5.70358	p10.5
508	2.07299e-05	2.87862e-09	0.0224933	0.583249	0.415653	0.459693	0.203198	0.0730938	7.61581	7.55932	7.44369	7.46485	7.36294	7.34187	7.31556	p10.5
509	0.45944	N/A	N/A	N/A	N/A	N/A	N/A	N/A	6.90404	6.90847	6.88144	6.91676	6.89362	6.92899	6.90849	p_non
510	0.00554229	0.45119	0.0214944	0.69142	0.0894157	0.249926	0.451688	0.0146049	7.92917	8.12201	7.98216	8.04533	8.02881	7.91489	7.75942	p11.5
511	0.0847327	N/A	N/A	N/A	N/A	N/A	N/A	N/A	7.09477	7.01952	6.98259	7.01863	6.94869	6.95653	6.97883	p_non
512	6.35172e-12	4.08092e-08	0.0224996	0.0293057	0.709481	0.820681	0.0300153	2.3175e-10	8.0876	8.07737	7.99458	7.88181	7.87411	7.73373	7.60406	p10.5
513	0.420626	N/A	N/A	N/A	N/A	N/A	N/A	N/A	8.27829	8.30433	8.13453	8.24749	8.22501	8.19512	8.2002	p_non
514	6.75116e-07	1.755e-05	0.00095077	0.173983	0.299328	0.915547	0.173904	0.0398178	8.2193	8.23352	8.02718	8.02427	7.94338	7.80328	7.70631	p11.5
515	0.124152	N/A	N/A	N/A	N/A	N/A	N/A	N/A	5.63957	5.58	5.68758	5.62543	5.66203	5.67615	5.69019	p_non
516	0.00486625	0.0458521	0.00752923	0.342272	0.223695	0.649526	0.440798	0.122067	6.24011	6.25137	6.24185	6.24635	6.19284	6.17477	6.15094	p11.5
517	0.0734992	N/A	N/A	N/A	N/A	N/A	N/A	N/A	9.76004	9.95409	9.67942	9.79173	9.72296	9.63445	9.56991	p_non
518	0.115231	N/A	N/A	N/A	N/A	N/A	N/A	N/A	5.08257	5.02703	5.07503	5.0268	5.06148	5.03957	4.99843	p_non
519	0.905901	N/A	N/A	N/A	N/A	N/A	N/A	N/A	4.93365	4.88596	4.93849	4.87753	4.91666	4.92405	4.90711	p_non
520	0.277255	N/A	N/A	N/A	N/A	N/A	N/A	N/A	6.61587	6.62357	6.66684	6.57921	6.70398	6.57271	6.55399	p_non
521	0.102455	N/A	N/A	N/A	N/A	N/A	N/A	N/A	5.42726	5.44462	5.46175	5.42127	5.41213	5.4117	5.41836	p_non
522	1.73254e-10	1.26313e-05	5.9003e-06	0.160301	0.857736	0.205981	0.00254828	0.0004626	7.05625	6.97847	6.94953	6.88854	6.8649	6.82004	6.82017	p10.5
523	0.031645	0.0272987	0.758401	0.456079	0.805794	0.439579	0.768334	0.0171045	4.96315	4.92756	4.94263	4.91028	4.95106	4.90612	4.85296	p10.5
524	0.0839923	N/A	N/A	N/A	N/A	N/A	N/A	N/A	7.50995	7.46343	7.40674	7.41784	7.41661	7.39357	7.43084	p_non
525	3.20768e-07	0.000667845	0.0895182	0.388676	0.772665	0.948572	0.196549	0.0014646	6.00586	5.92582	5.88557	5.87195	5.86656	5.8204	5.77262	p10.5
526	6.41274e-06	0.000400943	1.51174e-06	0.99981	0.127743	0.836438	0.36169	0.00666239	6.07594	6.05924	5.9474	5.99676	5.93799	5.90759	5.82716	p10.5
527	0.973194	N/A	N/A	N/A	N/A	N/A	N/A	N/A	4.905	4.88029	4.90758	4.87272	4.90075	4.91131	4.8891	p_non
528	0.158643	N/A	N/A	N/A	N/A	N/A	N/A	N/A	6.25584	6.25953	6.32519	6.27716	6.36997	6.33641	6.32691	p_non
529	0.0956446	N/A	N/A	N/A	N/A	N/A	N/A	N/A	7.85299	7.93081	7.84956	7.93764	7.9163	7.91447	7.95328	p_non
530	0.0914244	N/A	N/A	N/A	N/A	N/A	N/A	N/A	7.58894	7.63131	7.50928	7.53847	7.52485	7.49548	7.52523	p_non
531	2.61389e-05	0.000155387	0.0381169	0.107829	0.411239	0.481537	0.285678	0.107829	8.25946	8.30499	8.20199	8.13548	8.01383	7.96967	7.88879	p11.5
532	0.00287958	7.04426e-07	0.130353	0.721781	0.223591	0.410992	0.491009	0.0361158	8.52956	8.61487	8.6476	8.70257	8.61638	8.70045	8.75515	p18.5
533	0.00179143	0.00118123	0.104479	0.701326	0.48752	0.487914	0.194078	0.309879	7.49006	7.43541	7.35957	7.36611	7.27696	7.25419	7.28003	p10.5
534	0.555377	N/A	N/A	N/A	N/A	N/A	N/A	N/A	5.50983	5.46951	5.5366	5.47775	5.56466	5.48673	5.45239	p_non
535	8.92419e-12	5.25861e-13	0.00016551	0.114309	0.805798	0.390904	0.000811843	6.31867e-05	7.95387	7.76829	7.65311	7.59147	7.52123	7.42734	7.38464	p10.5
536	0.0370972	0.0872332	0.0374391	0.652104	0.55884	0.604598	0.310272	0.416973	4.46013	4.44523	4.48251	4.4661	4.48667	4.48885	4.48911	p_non
537	0.451987	N/A	N/A	N/A	N/A	N/A	N/A	N/A	5.02704	5.00485	5.04621	5.0116	5.05603	5.04859	5.03978	p_non
538	4.23293e-09	8.70316e-06	0.0178142	0.420569	0.829166	0.341586	0.0129453	0.00359559	8.16963	8.01852	7.90822	7.89127	7.83142	7.78961	7.75168	p10.5
539	1.42217e-05	0.00079604	0.0374391	0.0106395	0.237882	0.745157	0.374724	0.00817511	7.44211	7.43292	7.44975	7.37951	7.21117	7.12353	6.9117	p12.5
540	0.0309781	0.0215646	0.301394	0.872197	0.109892	0.494355	0.572153	0.290183	5.94702	5.95629	6.02281	5.9539	6.06404	6.04752	6.06414	p_non
541	1.71862e-11	9.98489e-10	2.45117e-06	0.0293654	0.440357	0.85531	0.00257386	0.000135974	8.50599	8.42217	8.27131	8.2143	8.13166	7.95576	7.85937	p10.5
542	0.810047	N/A	N/A	N/A	N/A	N/A	N/A	N/A	6.38034	6.3891	6.42755	6.48421	6.37253	6.42773	6.42342	p_non
543	7.47174e-05	0.610363	0.255007	0.00448125	0.377371	0.52958	0.196155	1.10004e-05	7.01234	7.0665	7.1312	7.02875	7.02795	6.90028	6.77974	p12.5
544	0.615316	N/A	N/A	N/A	N/A	N/A	N/A	N/A	4.13881	4.12651	4.16593	4.14594	4.15468	4.15877	4.14646	p_non
545	1.19593e-07	1.9091e-08	0.0233922	0.269957	0.988882	0.357371	0.00654314	0.0563433	8.92402	8.81973	8.72672	8.68286	8.64435	8.59432	8.58334	p10.5
546	0.13019	N/A	N/A	N/A	N/A	N/A	N/A	N/A	4.21063	4.19235	4.24835	4.20822	4.25574	4.24464	4.25115	p_non
547	3.80611e-05	1.10541e-05	0.00454992	0.864348	0.990905	0.293641	0.292122	0.0823285	7.37429	7.43211	7.51284	7.52086	7.48342	7.5572	7.6457	p_non
548	2.18741e-08	1.9091e-08	0.00748566	0.0660323	0.713024	0.683448	0.0641113	0.000323103	8.38944	8.55705	8.5161	8.6386	8.64335	8.80245	8.95252	p18.5
549	1.29617e-10	2.74035e-08	9.86222e-05	0.127334	0.453716	0.733003	0.000755515	0.000277217	8.21975	8.14094	8.05471	8.02983	7.96954	7.87986	7.82836	p10.5
550	0.0866518	N/A	N/A	N/A	N/A	N/A	N/A	N/A	5.18996	5.18876	5.30114	5.22152	5.342	5.28395	5.31668	p_non
551	0.0103033	0.0208436	0.224161	0.910743	0.230433	0.726507	0.270097	0.180733	7.17918	7.12834	7.0793	7.13467	7.04458	7.01761	7.0078	p10.5
552	7.45409e-05	3.90544e-05	0.0472647	0.119551	0.994293	0.711911	0.323041	0.0374391	10.0951	10.172	10.1362	10.2353	10.2171	10.2918	10.3943	p18.5
553	1.10589e-10	1.28764e-10	0.00179854	0.0853682	0.588624	0.541558	0.000260331	1.32078e-05	8.49954	8.32841	8.26378	8.15298	8.04123	7.88566	7.81206	p10.5
554	0.264764	N/A	N/A	N/A	N/A	N/A	N/A	N/A	5.42728	5.44237	5.50477	5.44972	5.55208	5.50047	5.49582	p_non
555	0.261684	N/A	N/A	N/A	N/A	N/A	N/A	N/A	5.46487	5.47145	5.55365	5.48029	5.56424	5.54814	5.53926	p_non
556	0.00516269	0.000449215	0.0665118	0.669714	0.243934	0.788363	0.16986	0.361921	4.42795	4.43817	4.50547	4.46849	4.50596	4.53205	4.52453	p_non
557	0.80813	N/A	N/A	N/A	N/A	N/A	N/A	N/A	6.24554	6.27539	6.31322	6.29576	6.31322	6.27944	6.2502	p_non
558	5.51981e-11	0.00442813	0.0027022	0.0381169	0.574934	0.590817	0.156426	3.25487e-10	7.24679	7.4029	7.39809	7.4844	7.49073	7.59329	7.78419	p18.5
559	6.89963e-09	1.26206e-08	0.00395186	0.412128	0.898815	0.554845	0.101783	0.00877865	6.37919	6.26221	6.19207	6.16416	6.13653	6.09748	6.04429	p10.5
560	0.129743	N/A	N/A	N/A	N/A	N/A	N/A	N/A	7.32268	7.39316	7.23867	7.26803	7.23888	7.20564	7.22783	p_non
561	0.985546	N/A	N/A	N/A	N/A	N/A	N/A	N/A	4.83767	4.81807	4.89076	4.80917	4.89527	4.84218	4.83589	p_non
562	1.31298e-08	0.00305945	0.00512503	0.73989	0.108229	0.452203	0.0032302	0.000298184	5.87766	5.77515	5.6061	5.53322	5.61499	5.48054	5.46298	p10.5
563	2.65132e-05	1.29602e-06	0.0130432	0.701801	0.642475	0.656747	0.104635	0.0390676	8.64152	8.64828	8.51023	8.51464	8.46233	8.41974	8.41443	p11.5
564	0.00014065	0.0151985	0.039398	0.994384	0.314048	0.924122	0.143068	0.0293305	9.83957	9.842	9.71831	9.7802	9.72395	9.64319	9.60145	p11.5
565	0.49061	N/A	N/A	N/A	N/A	N/A	N/A	N/A	6.0803	6.09285	6.08382	5.98639	6.09078	6.04775	6.03646	p_non
566	8.18343e-07	0.000260331	0.0420692	0.0847434	0.534558	0.263648	0.261411	0.055497	7.33242	7.47615	7.4606	7.50944	7.59624	7.59263	7.67609	p_non
567	2.73075e-05	1.80005e-11	0.013433	0.834259	0.834186	0.406346	0.00263043	0.161218	6.68542	6.61922	6.55394	6.55672	6.52191	6.48872	6.5097	p10.5
568	0.193802	N/A	N/A	N/A	N/A	N/A	N/A	N/A	4.96944	4.93157	4.96617	4.97791	4.94205	5.00076	5.01084	p_non
569	2.49291e-10	8.58902e-08	7.587e-06	0.104635	0.234209	0.753706	0.0537417	5.6847e-05	5.71491	5.73576	5.80184	5.80525	5.85687	5.9021	5.97473	p18.5
570	0.744498	N/A	N/A	N/A	N/A	N/A	N/A	N/A	7.97749	7.86411	7.88124	7.85895	7.82871	7.88874	7.91556	p_non
571	0.0122349	0.0838459	0.0132201	0.733724	0.53192	0.79283	0.503528	0.0678924	7.1255	7.31702	7.03955	7.10352	7.0543	6.85853	6.66772	p11.5
572	0.415461	N/A	N/A	N/A	N/A	N/A	N/A	N/A	5.51557	5.34633	5.55813	5.33839	5.47251	5.43064	5.31349	p_non
573	0.428805	N/A	N/A	N/A	N/A	N/A	N/A	N/A	5.71965	5.635	5.67292	5.67829	5.63357	5.69113	5.61601	p_non
574	0.629792	N/A	N/A	N/A	N/A	N/A	N/A	N/A	5.06705	5.04787	5.12627	5.05452	5.13344	5.09797	5.09491	p_non
575	3.08838e-06	0.00190661	0.00067777	0.71313	0.249926	0.836085	0.557969	0.00130694	7.15059	7.16833	7.32235	7.27717	7.32306	7.33453	7.44495	p18.5
576	5.76628e-08	1.32912e-07	0.000135889	0.0605867	0.855027	0.646926	0.123588	0.00888971	8.02129	8.10777	8.13281	8.26683	8.25291	8.40846	8.57192	p18.5
577	3.80611e-05	8.58256e-05	0.203714	0.250496	0.835535	0.150405	0.0322909	0.163024	8.78791	8.68494	8.66766	8.58336	8.46473	8.48171	8.49604	p10.5
578	0.00462474	0.00898677	0.0306882	0.25512	0.996644	0.614303	0.332516	0.327158	7.70923	7.74446	7.73616	7.78956	7.80598	7.83119	7.84917	p_non
579	4.91657e-10	1.4928e-07	1.99924e-06	0.0468696	0.710078	0.674639	0.0224996	2.58175e-09	5.82915	5.77984	5.71091	5.66785	5.67315	5.55436	5.49277	p10.5
580	0.951677	N/A	N/A	N/A	N/A	N/A	N/A	N/A	5.63702	5.5954	5.68528	5.58962	5.6213	5.63826	5.63495	p_non
581	0.868505	N/A	N/A	N/A	N/A	N/A	N/A	N/A	5.99967	5.96759	5.97535	5.91015	6.04187	5.94559	5.96392	p_non
582	2.2055e-06	2.09892e-08	0.0197595	0.789479	0.481802	0.704433	0.0292816	0.0634034	9.32983	9.29065	9.16158	9.18603	9.12995	9.05716	9.06373	p10.5
583	2.31876e-05	6.11834e-07	0.0210305	0.230083	0.531556	0.88284	0.458021	0.0439728	7.70289	7.74838	7.76918	7.78234	7.81169	7.83821	7.91053	p18.5
584	5.15482e-13	1.20109e-08	0.00409674	0.0118465	0.380445	0.353733	0.0251033	2.61377e-08	4.97349	5.03688	5.1367	5.16791	5.25844	5.29251	5.39404	p18.5
585	0.112393	N/A	N/A	N/A	N/A	N/A	N/A	N/A	5.65001	5.6235	5.7647	5.69153	5.79629	5.77439	5.76147	p_non
586	0.277255	N/A	N/A	N/A	N/A	N/A	N/A	N/A	5.62267	5.58314	5.63688	5.59558	5.63634	5.66452	5.65028	p_non
587	4.24396e-05	6.45084e-05	0.101634	0.233292	0.164796	0.429863	0.341586	0.000154839	7.2128	7.27434	7.26793	7.37422	7.302	7.38236	7.44988	p18.5
588	5.47029e-12	2.30479e-06	4.69728e-05	0.0130104	0.825641	0.28621	0.0037541	1.53766e-05	4.72478	4.79471	4.8795	4.97111	5.04893	5.09347	5.14218	p18.5
589	0.601693	N/A	N/A	N/A	N/A	N/A	N/A	N/A	4.36477	4.34235	4.40361	4.36313	4.3753	4.36803	4.35186	p_non
590	0.000970411	0.00608708	0.136049	0.282851	0.129187	0.655993	0.152526	0.0170292	5.42619	5.40675	5.36874	5.26833	5.35011	5.27471	5.25008	p10.5
591	9.40991e-06	0.000717296	0.0260507	0.331781	0.139674	0.971085	0.244109	0.0194295	8.93825	8.93259	8.81917	8.85824	8.76994	8.66162	8.55606	p10.5
592	0.163468	N/A	N/A	N/A	N/A	N/A	N/A	N/A	8.86578	8.86195	8.74205	8.81225	8.75427	8.73864	8.78472	p_non
593	0.157495	N/A	N/A	N/A	N/A	N/A	N/A	N/A	5.38975	5.37496	5.44832	5.40313	5.47147	5.45811	5.45257	p_non
594	7.77011e-11	1.83386e-06	0.000927066	0.138159	0.421888	0.938492	0.00389937	9.76733e-05	9.1047	8.98211	8.83791	8.81922	8.74414	8.5734	8.48542	p10.5
595	0.833891	N/A	N/A	N/A	N/A	N/A	N/A	N/A	4.68443	4.65703	4.7025	4.63421	4.7197	4.65917	4.66511	p_non
596	3.68873e-10	2.2361e-06	0.00271443	0.193446	0.892499	0.610153	0.0070192	0.00620261	8.05698	8.14943	8.25248	8.30568	8.29039	8.43903	8.48666	p18.5
597	2.4038e-09	1.78769e-12	0.00660347	0.354089	0.480469	0.375066	0.00187206	0.00318641	8.21803	8.02492	7.88226	7.88612	7.76006	7.68884	7.66086	p10.5
598	0.0122142	0.0186372	0.0116667	0.111189	0.272833	0.798255	0.422776	0.269139	3.943	3.9341	3.98532	4.00227	4.06391	4.1866	4.11399	p_non
599	0.00554229	6.64587e-09	0.0758557	0.769241	0.783833	0.466377	0.0959694	0.550563	9.26641	9.1583	9.05079	9.08918	9.01498	8.99355	9.03562	p10.5
600	0.0424872	0.208303	0.0925772	0.680543	0.113085	0.92817	0.55884	0.326447	8.75444	8.78513	8.63564	8.74187	8.65202	8.60099	8.56765	p_non
601	0.000114687	2.97815e-07	0.0515505	0.403429	0.61347	0.927228	0.0224996	0.0169381	8.38369	8.32727	8.18452	8.23818	8.22098	8.14672	8.14707	p10.5
602	0.0804286	N/A	N/A	N/A	N/A	N/A	N/A	N/A	7.50305	7.56645	7.55857	7.64727	7.61978	7.63827	7.65233	p_non
603	1.61369e-06	8.55042e-11	0.192376	0.160617	0.117839	0.469946	0.0790931	0.00343443	8.90186	9.19525	9.11842	9.33986	9.32634	9.3659	9.41845	p18.5
604	0.460125	N/A	N/A	N/A	N/A	N/A	N/A	N/A	5.77159	5.78429	5.88304	5.76269	5.84456	5.83976	5.84692	p_non
605	0.509719	N/A	N/A	N/A	N/A	N/A	N/A	N/A	7.83812	7.85742	7.83944	7.81526	7.7995	7.84245	7.89698	p_non
606	0.748664	N/A	N/A	N/A	N/A	N/A	N/A	N/A	4.51952	4.49538	4.55226	4.5085	4.53069	4.52843	4.53032	p_non
607	2.96169e-05	0.00657837	0.130353	0.0388002	0.805794	0.591666	0.219373	0.0139432	6.97617	6.97718	6.95534	7.00898	7.00112	7.04795	7.1017	p18.5
608	0.00880404	0.000212238	0.145836	0.66424	0.577483	0.0812288	0.769241	0.55884	6.1895	6.23134	6.28275	6.32747	6.37031	6.31347	6.32476	p_non
609	0.757352	N/A	N/A	N/A	N/A	N/A	N/A	N/A	5.06724	5.03409	5.08474	5.02514	5.08678	5.04691	5.04271	p_non
610	0.193802	N/A	N/A	N/A	N/A	N/A	N/A	N/A	6.01647	6.02194	6.12859	6.03494	6.19757	6.1055	6.13461	p_non
611	2.70337e-07	0.0829435	0.0247569	0.202718	0.651177	0.803376	0.000900996	0.0353321	6.66812	6.61505	6.59809	6.56129	6.57683	6.53055	6.51753	p_non
612	0.00430583	0.0197527	0.102411	0.632813	0.00277911	0.733724	0.593685	0.520017	6.29119	6.2048	5.98418	5.89845	5.98692	5.97092	5.97055	p10.5
613	5.46698e-08	0.0128807	0.000148696	0.0493063	0.385967	0.608917	0.109388	0.000177669	7.06293	7.0502	7.07727	7.12457	7.13645	7.23096	7.309	p18.5
614	0.228515	N/A	N/A	N/A	N/A	N/A	N/A	N/A	4.61299	4.61787	4.65175	4.62019	4.67879	4.65624	4.65358	p_non
615	9.95472e-08	6.64881e-11	0.00914305	0.223141	0.355147	0.429863	0.10316	0.0242472	6.23837	6.13129	6.07955	6.06759	5.98466	5.95149	5.91311	p10.5
616	0.000341544	0.0137113	0.248465	0.0618048	0.456079	0.647389	0.34069	0.0554775	7.08249	7.07112	7.10458	7.04847	7.03292	6.94176	6.84481	p_non
617	0.0459684	0.000106772	0.222048	0.176356	0.500816	0.104924	0.934687	0.658274	7.19679	7.35389	7.27317	7.35489	7.37574	7.32635	7.33658	p_non
618	2.82125e-07	2.23339e-06	0.00113907	0.0361172	0.227091	0.951718	0.203198	0.0197857	5.2606	5.30103	5.3248	5.34456	5.39555	5.47352	5.57021	p18.5
619	0.229108	N/A	N/A	N/A	N/A	N/A	N/A	N/A	5.49574	5.49409	5.53025	5.45555	5.56281	5.44493	5.4358	p_non
620	0.0437485	0.481802	0.00468574	0.562864	0.0345347	0.809165	0.706248	0.12939	8.88543	9.06522	8.97431	9.06032	8.95102	8.87771	8.71083	p11.5
621	0.000171133	0.00409347	0.0704929	0.634595	0.269335	0.55884	0.15794	0.0665293	7.3323	7.28327	7.22185	7.24458	7.1588	7.12754	7.11963	p10.5
622	1.01942e-08	2.09892e-08	0.0114947	0.735773	0.777755	0.390904	0.000260202	0.000362195	5.97241	5.9524	5.81117	5.8107	5.83365	5.70852	5.66244	p10.5
623	2.4038e-09	2.96223e-10	0.00344098	0.311711	0.580215	0.529264	0.00609011	0.00143954	9.3178	9.15512	9.01892	9.00738	8.91459	8.8232	8.78486	p10.5
624	1.94099e-08	0.0011396	0.182122	0.00145913	0.310573	0.123588	0.0223176	0.000452037	5.10936	5.2564	5.22615	5.27042	5.39509	5.39462	5.40612	p18.5
625	0.401022	N/A	N/A	N/A	N/A	N/A	N/A	N/A	5.71179	5.68779	5.77234	5.70298	5.78303	5.7495	5.7574	p_non
626	4.69537e-05	0.00169266	0.0351775	0.662419	0.753988	0.8363	0.263648	0.101783	7.75534	7.67913	7.46075	7.50414	7.50265	7.40556	7.32861	p10.5
627	3.10964e-07	1.84243e-06	0.000385432	0.21816	0.467154	0.217677	0.146961	0.00364415	7.51456	7.59799	7.68674	7.73566	7.69911	7.95112	8.09659	p18.5
628	0.00795899	1.05228e-06	0.620215	0.311711	0.0602373	0.665992	0.452264	0.0557024	7.36898	7.47033	7.41873	7.54365	7.45833	7.5219	7.57437	p_non
629	1.65608e-07	2.4853e-07	5.40555e-07	0.112072	0.624818	0.886336	0.223999	0.0141282	6.72203	6.73911	6.47138	6.36717	6.28156	6.09659	5.87327	p11.5
630	0.000418924	0.00223301	0.0213312	0.452264	0.0925772	0.630173	0.177271	0.0603813	6.86791	6.88336	6.83651	6.85626	6.7858	6.76767	6.74489	p11.5
631	0.0484626	0.292215	0.30695	0.000761138	0.44718	0.507538	0.461923	5.83931e-07	6.1221	6.13159	6.18674	6.16313	6.15415	6.12966	6.0916	p12.5
632	0.0130931	0.00464918	0.0998863	0.465097	0.455441	0.62889	0.757503	0.152232	6.22643	6.2478	6.25421	6.26202	6.32666	6.31817	6.3843	p_non
633	0.678103	N/A	N/A	N/A	N/A	N/A	N/A	N/A	5.91444	5.91594	5.89306	5.93909	5.89037	5.91452	5.93889	p_non
634	0.753893	N/A	N/A	N/A	N/A	N/A	N/A	N/A	9.26824	9.39923	9.25392	9.3545	9.33042	9.28181	9.28509	p_non
635	0.401022	N/A	N/A	N/A	N/A	N/A	N/A	N/A	6.18126	6.18467	6.26541	6.17329	6.34217	6.22384	6.2592	p_non
636	2.22769e-09	3.50774e-11	0.0462955	0.327318	0.880389	0.809165	0.0293654	0.00474023	8.22154	8.15006	8.07566	8.04834	8.0487	7.99954	7.96785	p10.5
637	1.85021e-05	0.00066216	0.183792	0.196902	0.778669	0.248465	0.148161	0.0152373	7.27913	7.32763	7.33189	7.40238	7.34549	7.48795	7.6235	p18.5
638	1.3463e-05	0.0853682	0.711486	0.178252	0.772665	0.62889	0.0645234	0.0590799	8.41599	8.26945	8.26159	8.24041	8.2082	8.15357	8.13608	p_non
639	0.262283	N/A	N/A	N/A	N/A	N/A	N/A	N/A	6.8081	6.78937	6.89944	6.81884	6.90207	6.9021	6.88976	p_non
640	0.577616	N/A	N/A	N/A	N/A	N/A	N/A	N/A	4.98179	4.9813	4.99888	4.94702	5.03422	4.93905	4.96429	p_non
641	3.15667e-06	4.13483e-05	0.110703	0.338153	0.592402	0.711023	0.33123	0.010619	6.11381	6.166	6.22709	6.23842	6.27831	6.30589	6.36247	p18.5
642	1.18268e-13	3.51271e-10	7.54338e-05	0.108869	0.980323	0.828863	0.00347621	1.26957e-08	7.29367	7.09899	6.93374	6.85576	6.86681	6.68497	6.58629	p10.5
643	7.4914e-07	0.0225341	0.143796	0.211095	0.359859	0.390904	0.0856841	0.00797359	8.16938	8.11256	8.04554	8.0294	7.92634	7.91892	7.87002	p10.5
644	4.88597e-09	8.51292e-05	0.000323103	0.00395242	0.34069	0.498719	0.0618048	0.00150467	6.84126	6.88369	6.88417	6.9473	6.95547	7.07994	7.19027	p18.5
645	0.390907	N/A	N/A	N/A	N/A	N/A	N/A	N/A	5.48918	5.50431	5.59263	5.51142	5.6397	5.55365	5.56557	p_non
646	4.13344e-05	0.00134721	0.00153328	0.212713	0.485469	0.656747	0.639394	0.000350499	5.2078	5.1452	5.12476	5.01718	5.02447	5.01545	4.93244	p10.5
647	2.99005e-13	3.70671e-12	0.00223301	0.0532255	0.640873	0.654149	0.000523078	1.84243e-06	8.55125	8.41584	8.25935	8.19663	8.12917	7.99074	7.90721	p10.5
648	7.57223e-09	1.35143e-05	0.0375603	0.160645	0.260776	0.675282	0.0279997	0.000225585	5.65225	5.6937	5.81526	5.79419	5.89265	5.94555	6.04519	p18.5
649	0.0330802	0.0659245	0.323781	0.594351	0.771802	0.54413	0.756101	0.0317982	5.92043	5.89976	5.90656	5.88774	5.85517	5.86636	5.83039	p_non
650	0.343089	N/A	N/A	N/A	N/A	N/A	N/A	N/A	5.01057	5.00647	5.10383	5.03391	5.11882	5.06838	5.08047	p_non
651	3.29065e-05	2.50855e-08	0.00187656	0.187291	0.902644	0.956335	0.313531	0.040092	5.68611	6.1287	6.31778	6.67825	6.65883	7.016	7.2582	p18.5
652	0.399656	N/A	N/A	N/A	N/A	N/A	N/A	N/A	5.64481	5.63493	5.70443	5.67448	5.71101	5.69366	5.67464	p_non
653	0.586238	N/A	N/A	N/A	N/A	N/A	N/A	N/A	6.25254	6.28453	6.35477	6.29079	6.4118	6.32118	6.30631	p_non
654	0.00135075	0.000712442	0.662142	0.95737	0.640891	0.331919	0.228678	0.140868	5.4276	5.31749	5.28034	5.2631	5.30972	5.24602	5.2208	p10.5
655	0.272569	N/A	N/A	N/A	N/A	N/A	N/A	N/A	4.58501	4.57353	4.64409	4.59003	4.64962	4.65131	4.625	p_non
656	0.0373223	0.187291	0.0853682	0.725152	0.105893	0.56973	0.83094	0.146716	6.63884	6.64853	6.61426	6.64818	6.56357	6.58387	6.53122	p_non
657	0.000391129	0.00137525	0.104151	0.754291	0.582037	0.987036	0.0327909	0.281831	5.07908	5.09809	5.15637	5.14953	5.16696	5.21299	5.22333	p_non
658	0.00463361	0.696546	0.108701	0.234421	0.104151	0.723868	0.281831	0.0333103	8.161	8.20432	8.20895	8.21745	8.12983	8.10086	8.05973	p_non
659	4.59594e-08	0.00147175	0.000870175	0.29663	0.910736	0.622528	0.0638023	0.000271866	8.2442	8.33518	8.35626	8.42499	8.41508	8.50828	8.58838	p18.5
660	0.368001	N/A	N/A	N/A	N/A	N/A	N/A	N/A	4.84067	4.86412	4.93713	4.866	4.96522	4.89607	4.91588	p_non
661	1.13364e-07	0.000584203	0.0943018	0.170783	0.440798	0.790285	0.100318	0.00885325	7.98055	7.87371	7.80682	7.77705	7.71026	7.60183	7.5576	p10.5
662	6.38455e-06	1.08985e-05	0.0070192	0.644323	0.41426	0.749962	0.0780948	0.0225341	8.70955	8.66723	8.55688	8.57636	8.51309	8.45188	8.43261	p10.5
663	0.0502715	N/A	N/A	N/A	N/A	N/A	N/A	N/A	5.28236	5.27165	5.35063	5.31997	5.36543	5.35492	5.35743	p_non
664	1.04129e-08	0.0141802	0.0276142	0.0939376	0.927228	0.994293	0.132257	0.000231567	9.06566	9.15706	9.15166	9.24904	9.2444	9.30813	9.4035	p18.5
665	0.172028	N/A	N/A	N/A	N/A	N/A	N/A	N/A	6.77044	6.78545	6.72529	6.75905	6.69721	6.71468	6.71423	p_non
666	0.119536	N/A	N/A	N/A	N/A	N/A	N/A	N/A	9.23431	9.29909	9.26201	9.30785	9.27811	9.30493	9.33028	p_non
667	0.508521	N/A	N/A	N/A	N/A	N/A	N/A	N/A	4.77996	4.77321	4.85026	4.77284	4.87547	4.8218	4.8226	p_non
668	0.00385156	0.00888554	0.480616	0.316048	0.771264	0.304505	0.540218	0.0364433	8.5575	8.59235	8.58386	8.60264	8.5764	8.64151	8.71644	p18.5
669	2.07933e-07	0.00447837	0.00408627	0.159274	0.562138	0.367438	0.00458592	0.0208895	8.79001	8.66259	8.5651	8.5422	8.41695	8.37243	8.37148	p10.5
670	0.291605	N/A	N/A	N/A	N/A	N/A	N/A	N/A	5.56407	5.52315	5.60853	5.51094	5.58252	5.52759	5.499	p_non
671	0.369466	N/A	N/A	N/A	N/A	N/A	N/A	N/A	5.54665	5.51238	5.61018	5.51836	5.55272	5.62695	5.59473	p_non
672	0.239479	N/A	N/A	N/A	N/A	N/A	N/A	N/A	5.57589	5.58231	5.67441	5.60662	5.71497	5.63799	5.66363	p_non
673	1.29029e-08	2.93363e-07	0.00120234	0.0991239	0.19585	0.779792	0.109113	0.000622884	8.11541	8.10644	7.95153	7.95546	7.8931	7.72454	7.56279	p10.5
674	2.93793e-07	5.4407e-07	0.00280949	0.260776	0.765049	0.641564	0.236469	0.00202354	7.39067	7.21029	7.15953	7.09879	7.03778	6.99439	6.89722	p10.5
675	3.55072e-12	1.04229e-09	8.48034e-06	0.0741968	0.99981	0.919286	0.00444572	7.36033e-05	6.58685	6.74723	6.81113	6.92453	6.93004	7.06552	7.14886	p18.5
676	8.23725e-07	4.19915e-05	0.000428483	0.221477	0.314575	0.911263	0.126704	0.0222018	8.55392	8.52947	8.368	8.37283	8.27499	8.12629	8.04032	p10.5
677	0.00316111	0.0602373	0.276628	0.341586	0.480469	0.429863	0.307689	0.604094	6.88917	6.85065	6.84238	6.80874	6.80499	6.79209	6.81031	p_non
678	2.37625e-09	5.25861e-13	0.059803	0.189416	0.56973	0.492136	0.00811266	0.00427783	7.37327	7.25308	7.20017	7.18849	7.13384	7.08774	7.05833	p10.5
679	0.0272715	0.0256465	0.860998	0.132205	0.120562	0.66682	0.421552	0.229891	4.94955	4.91151	4.94257	4.89507	4.92269	4.90197	4.89903	p10.5
680	0.980873	N/A	N/A	N/A	N/A	N/A	N/A	N/A	5.83141	5.83298	5.81962	5.84648	5.81512	5.83618	5.83006	p_non
681	0.307788	N/A	N/A	N/A	N/A	N/A	N/A	N/A	5.3827	5.34036	5.3753	5.29392	5.37355	5.31548	5.32684	p_non
682	0.128154	N/A	N/A	N/A	N/A	N/A	N/A	N/A	5.13964	5.10805	5.14988	5.1113	5.16301	5.19121	5.16554	p_non
683	2.59638e-10	1.39628e-11	7.23417e-05	0.247445	0.519499	0.403434	0.00412668	0.0023572	7.80148	7.6792	7.57097	7.55189	7.46744	7.39861	7.36407	p10.5
684	0.0323496	0.0282365	0.00713599	0.30317	0.858407	0.29567	0.753351	0.391136	7.22746	7.24743	7.2324	7.17795	7.09527	7.145	7.11772	p11.5
685	0.886536	N/A	N/A	N/A	N/A	N/A	N/A	N/A	5.12173	4.98388	5.08674	5.06991	4.9741	5.23275	5.01765	p_non
686	1.96932e-08	4.30905e-07	5.49095e-06	0.167371	0.229884	0.448174	0.244109	0.00656284	5.06001	5.07507	5.21087	5.20356	5.23669	5.33999	5.58687	p18.5
687	0.10085	N/A	N/A	N/A	N/A	N/A	N/A	N/A	6.23591	6.23384	6.22279	6.23968	6.22725	6.21546	6.20491	p_non
688	2.62337e-08	0.036441	0.119341	0.403429	0.92817	0.801205	0.0260507	0.00272793	6.49576	6.44611	6.36918	6.34037	6.35029	6.26797	6.263	p10.5
689	0.0260794	0.0823285	0.39006	0.285678	0.159759	0.809045	0.47981	0.369682	5.89391	5.87073	5.88683	5.83936	5.85171	5.84323	5.84275	p_non
690	0.0084878	0.0163602	0.0855863	0.29002	0.886336	0.649783	0.602254	0.315151	6.35332	6.34723	6.3658	6.43042	6.46493	6.47831	6.55098	p_non
691	0.00100178	0.00209766	0.147257	0.323258	0.591666	0.317408	0.0576847	0.199548	8.91012	8.93564	8.89868	8.88962	8.84026	8.82441	8.83373	p_non
692	4.65934e-05	0.000189001	0.0731966	0.0893517	0.694336	0.22517	0.307218	0.0189752	7.86013	7.93508	7.9284	7.98739	7.94904	8.10216	8.26234	p18.5
693	3.53277e-06	3.1657e-10	8.26912e-06	0.366979	0.940621	0.224393	0.354089	0.0345213	6.41733	6.50719	6.61915	6.65819	6.74432	6.6956	6.74728	p18.5
694	0.676285	N/A	N/A	N/A	N/A	N/A	N/A	N/A	8.30598	8.2897	8.24611	8.23603	8.1816	8.25851	8.27251	p_non
695	0.935856	N/A	N/A	N/A	N/A	N/A	N/A	N/A	4.62935	4.61202	4.66361	4.62185	4.66665	4.6357	4.63186	p_non
696	0.987266	N/A	N/A	N/A	N/A	N/A	N/A	N/A	6.34148	6.2886	6.35696	6.26894	6.30338	6.29919	6.34716	p_non
697	0.716495	N/A	N/A	N/A	N/A	N/A	N/A	N/A	6.59773	6.6425	6.66977	6.59915	6.58888	6.65678	6.66341	p_non
698	0.000223102	0.0181637	4.93639e-05	0.760377	0.167826	0.806783	0.208303	0.0618048	9.52924	9.62547	9.43493	9.4909	9.43375	9.30026	9.23319	p11.5
699	0.794827	N/A	N/A	N/A	N/A	N/A	N/A	N/A	7.36858	7.34045	7.3688	7.32522	7.30511	7.33908	7.39566	p_non
700	0.201757	N/A	N/A	N/A	N/A	N/A	N/A	N/A	6.68424	6.67166	6.64764	6.65945	6.70179	6.61941	6.58303	p_non
701	0.172028	N/A	N/A	N/A	N/A	N/A	N/A	N/A	4.61089	4.55672	4.61697	4.57039	4.60424	4.54395	4.56135	p_non
702	0.159678	N/A	N/A	N/A	N/A	N/A	N/A	N/A	5.33447	5.36145	5.40161	5.34459	5.42886	5.37798	5.41613	p_non
703	9.01733e-09	4.35118e-05	8.11326e-06	0.401518	0.872197	0.938492	0.0827786	0.00917116	6.3262	6.45172	6.53852	6.58546	6.57509	6.6641	6.72051	p18.5
704	0.862973	N/A	N/A	N/A	N/A	N/A	N/A	N/A	7.57941	7.66316	7.67683	7.66333	7.7183	7.63992	7.63203	p_non
705	0.352935	N/A	N/A	N/A	N/A	N/A	N/A	N/A	8.32138	8.45767	8.36139	8.45738	8.4315	8.36324	8.28347	p_non
706	0.49061	N/A	N/A	N/A	N/A	N/A	N/A	N/A	8.50037	8.47222	8.4358	8.51986	8.42546	8.46213	8.43337	p_non
707	0.983218	N/A	N/A	N/A	N/A	N/A	N/A	N/A	7.85979	8.02087	8.05009	8.05958	7.98244	8.04586	7.92729	p_non
708	0.293777	N/A	N/A	N/A	N/A	N/A	N/A	N/A	7.55098	7.65983	7.82759	7.87002	7.78093	7.87792	7.74036	p_non
709	0.00118698	8.92873e-06	0.88259	0.239144	0.9753	0.781934	0.836438	0.00465998	8.20831	8.37671	8.27276	8.36862	8.39171	8.38107	8.51837	p18.5
710	0.000397158	0.101783	0.292215	0.111169	0.605729	0.943818	0.0981379	0.0163602	6.52025	6.52669	6.53799	6.42027	6.45272	6.39814	6.36648	p_non
711	3.70224e-06	0.000399391	0.00337874	0.0429409	0.653814	0.55884	0.299366	0.0193847	8.1457	8.22126	8.23617	8.31621	8.32647	8.46216	8.64863	p18.5
712	0.0139401	0.00337475	0.58234	0.305973	0.61455	0.282938	0.147402	0.0325609	6.32923	6.30204	6.31646	6.25057	6.33712	6.21794	6.19243	p_non
713	0.939479	N/A	N/A	N/A	N/A	N/A	N/A	N/A	6.88219	6.88942	6.97136	6.91513	7.05002	6.91193	6.87379	p_non
714	9.47873e-12	1.17431e-12	0.00117746	0.149179	0.675899	0.337901	0.00271157	2.19796e-05	7.44042	7.2886	7.18794	7.12197	7.03569	6.96582	6.9018	p10.5
715	0.903507	N/A	N/A	N/A	N/A	N/A	N/A	N/A	4.73639	4.71996	4.79999	4.73145	4.82926	4.74013	4.75052	p_non
716	0.0166064	0.10748	0.277075	0.422649	0.734127	0.391783	0.710112	0.115305	7.23711	7.28777	7.28759	7.34699	7.29834	7.34205	7.40108	p_non
717	0.00513324	0.0164694	0.00104609	0.686545	0.341586	0.988882	0.19322	0.043918	7.92332	7.96223	7.81479	7.88705	7.83876	7.77471	7.76874	p11.5
718	0.415461	N/A	N/A	N/A	N/A	N/A	N/A	N/A	6.20816	6.197	6.25713	6.15938	6.28184	6.16379	6.16176	p_non
719	0.601693	N/A	N/A	N/A	N/A	N/A	N/A	N/A	5.85435	5.86613	5.94824	5.81036	5.93567	5.90033	5.90609	p_non
720	2.0835e-10	9.29562e-07	0.00254828	0.19322	0.537322	0.605006	0.00273831	0.000123705	7.84876	7.69003	7.5568	7.53228	7.44249	7.3307	7.27637	p10.5
721	4.25112e-07	4.75526e-13	0.00477999	0.622542	0.948572	0.326727	0.0124319	0.0659245	8.16747	8.06683	7.96283	7.95113	7.90937	7.87527	7.86811	p10.5
722	0.0027955	0.033285	0.0812288	0.697176	0.980323	0.581635	0.16986	0.201654	6.85477	6.82211	6.80045	6.78337	6.76752	6.75108	6.75554	p10.5
723	5.54884e-10	1.4928e-07	0.0592522	0.284998	0.81418	0.110866	0.00256197	0.00296369	7.55226	7.34671	7.27021	7.19173	7.14588	7.09866	7.0733	p10.5
724	0.0522092	N/A	N/A	N/A	N/A	N/A	N/A	N/A	4.58707	4.56391	4.55925	4.53087	4.56296	4.51545	4.52808	p_non
725	0.8293	N/A	N/A	N/A	N/A	N/A	N/A	N/A	5.16162	5.1492	5.20591	5.12054	5.21868	5.16328	5.14188	p_non
726	0.350716	N/A	N/A	N/A	N/A	N/A	N/A	N/A	5.55853	5.51107	5.59913	5.54584	5.60607	5.62223	5.59047	p_non
727	0.053022	N/A	N/A	N/A	N/A	N/A	N/A	N/A	4.39736	4.42129	4.4855	4.46412	4.4666	4.48491	4.46632	p_non
728	0.380569	N/A	N/A	N/A	N/A	N/A	N/A	N/A	5.05191	5.01801	5.11626	5.05268	5.08174	5.1207	5.08407	p_non
729	3.79869e-10	6.94579e-05	0.000492529	0.130353	0.312558	0.815832	0.0059811	0.000675732	8.50429	8.4122	8.28937	8.26912	8.17674	8.03348	7.95873	p10.5
730	0.714522	N/A	N/A	N/A	N/A	N/A	N/A	N/A	5.6777	5.67886	5.77395	5.68024	5.83216	5.70801	5.72092	p_non
731	0.0740376	N/A	N/A	N/A	N/A	N/A	N/A	N/A	7.47455	7.42922	7.42343	7.40622	7.39664	7.40894	7.42091	p_non
732	4.39364e-05	1.3223e-06	0.000126952	0.539868	0.415195	0.244255	0.412128	0.0908342	8.46973	8.43926	8.31404	8.31521	8.18664	8.22156	8.1729	p10.5
733	1.80179e-08	5.8048e-06	0.0301522	0.369658	0.724199	0.565649	0.000726807	0.00443537	8.83308	8.74188	8.62324	8.61653	8.56132	8.48932	8.47082	p10.5
734	0.000223632	6.92323e-06	0.000260331	0.503583	0.137641	0.37666	0.247445	0.238482	6.85789	6.82918	6.76253	6.78255	6.68833	6.67192	6.67484	p10.5
735	2.37345e-07	0.000602352	0.00718385	0.314048	0.822851	0.946291	0.00045148	0.0234818	8.07301	8.05342	7.96193	7.94677	7.93352	7.84866	7.86469	p10.5
736	0.116573	N/A	N/A	N/A	N/A	N/A	N/A	N/A	5.48447	5.48944	5.61204	5.52817	5.6332	5.60512	5.62244	p_non
737	0.019879	2.56335e-05	0.421052	0.542614	0.541558	0.200406	0.292347	0.55322	7.15667	7.1289	7.1283	7.1201	7.06394	7.08005	7.08961	p10.5
738	0.71859	N/A	N/A	N/A	N/A	N/A	N/A	N/A	7.64759	7.77509	7.65943	7.68092	7.6688	7.65383	7.65901	p_non
739	0.477941	N/A	N/A	N/A	N/A	N/A	N/A	N/A	6.93558	6.90988	6.92956	6.9425	6.85433	6.95947	6.97821	p_non
740	2.70337e-07	8.58256e-05	0.1334	0.230845	0.832963	0.403429	0.0973075	0.00448442	8.53618	8.61433	8.65416	8.67933	8.66627	8.74601	8.82462	p18.5
741	0.0236874	0.0468696	0.000109446	0.884213	0.908624	0.298273	0.899944	0.25461	7.13767	7.13838	7.20097	7.20407	7.26151	7.20406	7.23467	p_non
742	0.922436	N/A	N/A	N/A	N/A	N/A	N/A	N/A	6.45375	6.55483	6.50893	6.49361	6.41917	6.48066	6.51696	p_non
743	0.132812	N/A	N/A	N/A	N/A	N/A	N/A	N/A	3.9149	3.87642	3.8947	3.88492	3.88941	3.87446	3.87108	p_non
744	0.620539	N/A	N/A	N/A	N/A	N/A	N/A	N/A	6.56388	6.58305	6.65826	6.58281	6.65681	6.58172	6.55731	p_non
745	0.095903	N/A	N/A	N/A	N/A	N/A	N/A	N/A	6.30233	6.27129	6.30196	6.29826	6.28542	6.33028	6.36536	p_non
746	0.0127098	0.987387	0.00512503	0.415195	0.972232	0.0569963	0.501424	0.000185308	6.27572	6.386	6.31901	6.27896	6.39559	6.23558	6.09875	p_non
747	0.399217	N/A	N/A	N/A	N/A	N/A	N/A	N/A	5.15438	5.16661	5.22503	5.14689	5.26613	5.19761	5.21782	p_non
748	0.460986	N/A	N/A	N/A	N/A	N/A	N/A	N/A	5.45715	5.42541	5.52591	5.4519	5.53348	5.50826	5.48935	p_non
749	4.6069e-09	4.95979e-08	0.000279785	0.153168	0.290759	0.822431	0.0387913	0.00637566	9.19147	9.16627	9.03567	9.03625	8.95832	8.85208	8.78123	p10.5
750	0.0182985	0.77717	0.979119	0.227016	0.710078	0.312055	0.910743	0.00776761	7.66179	7.67566	7.61002	7.6633	7.63858	7.67989	7.78992	p18.5
751	0.860459	N/A	N/A	N/A	N/A	N/A	N/A	N/A	6.43084	6.46158	6.47	6.40483	6.49671	6.43683	6.46465	p_non
752	0.806431	N/A	N/A	N/A	N/A	N/A	N/A	N/A	6.29622	6.29219	6.38014	6.26989	6.39491	6.32235	6.32378	p_non
753	0.69102	N/A	N/A	N/A	N/A	N/A	N/A	N/A	7.80649	7.79453	7.83718	7.77344	7.84519	7.81493	7.8273	p_non
754	0.000127046	0.0131019	0.131466	0.0197102	0.901673	0.948278	0.260975	0.000169296	6.78573	6.82373	6.78769	6.86817	6.8675	6.89904	6.95345	p18.5
755	1.43169e-06	0.00151703	0.119551	0.0932537	0.237259	0.308786	0.191193	0.0481848	7.59492	7.55568	7.53761	7.52621	7.45726	7.45024	7.41824	p10.5
756	0.00895974	0.592328	0.0641113	0.532563	0.517846	0.112072	0.240052	0.00810515	8.16853	8.14176	8.15516	8.15781	8.13227	8.2042	8.24979	p18.5
757	0.968889	N/A	N/A	N/A	N/A	N/A	N/A	N/A	5.67894	5.66751	5.73223	5.64625	5.78462	5.66465	5.67787	p_non
758	6.35172e-12	6.40105e-13	0.00308108	0.0672344	0.562357	0.452264	0.00331509	2.6507e-05	7.73111	7.54613	7.44949	7.39698	7.30354	7.2175	7.14335	p10.5
759	2.70337e-07	0.0164694	0.0112678	0.947052	0.401718	0.998286	0.0088706	9.4901e-06	8.2531	8.27283	8.08245	8.1192	8.07798	7.99238	7.93214	p11.5
760	3.76541e-11	5.21011e-10	0.000854134	0.104151	0.507396	0.555004	0.00337475	0.000212238	7.92825	7.7895	7.67947	7.61871	7.52023	7.40007	7.32346	p10.5
761	0.0157509	4.35118e-05	0.01192	0.969128	0.54487	0.834059	0.403979	0.301364	7.48823	7.59851	7.81865	7.91054	7.79481	7.95221	7.93076	p_non
762	5.63099e-15	7.587e-06	2.24185e-05	0.017635	0.814752	0.961652	0.000248178	8.29924e-08	7.56664	7.45145	7.36436	7.28727	7.27289	7.14682	7.06938	p10.5
763	0.415166	N/A	N/A	N/A	N/A	N/A	N/A	N/A	5.32328	5.30705	5.3717	5.34548	5.41053	5.36219	5.35675	p_non
764	0.0229833	0.00713599	0.263652	0.371553	0.815832	0.493874	0.187454	0.269977	8.77633	8.74563	8.74614	8.69296	8.73824	8.64473	8.6636	p10.5
765	6.79159e-06	0.000609482	0.0591707	0.23979	0.354484	0.810775	0.0842221	0.0025075	9.03064	9.15765	9.12901	9.27968	9.22751	9.34127	9.36912	p18.5
