# Supplementary material for: A Provisional Gene Regulatory Atlas for Mouse Heart Development
Source: PLoS One. 2014 Jan 8;9(1):e83364. doi: 10.1371/journal.pone.0083364 (PMC3885437; doi:10.1371/journal.pone.0083364)
Supplement: Table S9 — Inferred gene co-regulations by three transcription factors. (XLSX) [file pone.0083364.s011.xlsx]

## Sheet: final_tf_tf_tf_target.txt
JasparID of TF1	GeneID of TF1(mouse homolog)	JasparID of TF2	GeneID of TF2(mouse homolog)	JasparID of TF3	GeneID of TF3(mouse homolog)	GeneID of common Gene Target	TF1_TF2 (1/0)	TF2_TF3(1/0)	TF1_TF3(1/0)
9346	16658	9405	16476	9372	20848	20493(module 144)	1	1	0
9346	16658	9405	16476	9372	20848	64380(module 144)	1	1	0
9346	16658	9405	16476	9372	20848	69592(module 144)	1	1	0
9405	16476	9346	16658	9372	20848	56492(module 555)	1	0	1
9405	16476	9346	16658	9372	20848	68344(module 555)	1	0	1
9405	16476	9346	16658	9372	20848	68498(module 555)	1	0	1
9405	16476	9346	16658	9372	20848	71103(module 555)	1	0	1
9405	16476	9346	16658	9372	20848	72252(module 555)	1	0	1
9405	16476	9346	16658	9372	20848	110197(module 555)	1	0	1
9405	16476	9346	16658	9372	20848	243168(module 555)	1	0	1
9405	16476	9346	16658	9372	20848	269784(module 555)	1	0	1
9266	14581	9320	21423	9362	12189	13869(module 475)	1	1	0
9266	14581	9320	21423	9362	12189	14999(module 475)	1	1	0
9266	14581	9320	21423	9362	12189	18048(module 475)	1	1	0
9266	14581	9320	21423	9362	12189	20209(module 475)	1	1	0
9266	14581	9320	21423	9362	12189	75453(module 475)	1	1	0
9266	14581	9320	21423	9362	12189	75706(module 475)	1	1	0
9266	14581	9320	21423	9362	12189	235402(module 475)	1	1	0
9266	14581	9320	21423	9362	12189	246700(module 475)	1	1	0
9266	14581	9320	21423	9362	12189	74362(module 475)	1	1	0
9266	14581	9320	21423	9362	12189	14763(module 475)	1	1	0
9266	14581	9320	21423	9362	12189	20678(module 475)	1	1	0
9266	14581	9320	21423	9362	12189	76829(module 475)	1	1	0
9266	14581	9320	21423	9362	12189	217845(module 475)	1	1	0
9266	14581	9320	21423	9362	12189	228801(module 475)	1	1	0
9320	21423	9362	12189	9266	14581	170442(module 55)	1	0	1
9320	21423	9362	12189	9266	14581	16671(module 55)	1	0	1
9320	21423	9362	12189	9266	14581	11354(module 55)	1	0	1
